# Supplementary material
Source: MDPI journal article supplement (https://www.mdpi.com/2071-1050/13/8/4475)
Supplement: s1 [file s1]

**Table S1. List of the collated studies on agricultural terraces in the Mediterranean area.**

| <b>N</b> | <b>Country</b> | <b>Reference</b>                   | <b>Type of terrace</b> |
|----------|----------------|------------------------------------|------------------------|
| 1.       | Portugal       | Hayes 1956                         | Dry stone terraces     |
| 2.       | Portugal       | Stanislawski 1962                  | Dry stone terraces     |
| 3.       | Portugal       | Magalães et al. 1985               | NA                     |
| 4.       | Portugal       | Estabrook 1998                     | Dry stone terraces     |
| 5.       | Portugal       | Oliveira et al. 2001               | Earth embankments      |
| 6.       | Portugal       | Estabrook 2007                     | Dry stone terraces     |
| 7.       | Portugal       | Pereira et al. 2009                | NA                     |
| 8.       | Portugal       | Nunes et al. 2015                  | Dry stone terraces     |
| 9.       | Portugal       | Faria et al. 2017                  | Mixed                  |
| 10.      | Portugal       | Kiesow and Bork 2017               | Dry stone terraces     |
| 11.      | Portugal       | Nunes et al. 2018                  | Dry stone terraces     |
| 12.      | Portugal       | Fernandes et al. 2017a             | Earth embankments      |
| 13.      | Portugal       | Fernandes et al. 2017b             | Earth embankments      |
| 14.      | Spain          | Grimalt et al. 1992                | Dry stone terraces     |
| 15.      | Spain          | Llorens et al. 1992                | Dry stone terraces     |
| 16.      | Spain          | Douglas et al. 1994                | Dry stone terraces     |
| 17.      | Spain          | Gallart et al. 1994                | Dry stone terraces     |
| 18.      | Spain          | Douglas et al. 1996                | Dry stone terraces     |
| 19.      | Spain          | Ramos and Porta 1997               | Dry stone terraces     |
| 20.      | Spain          | Ruecker et al. 1998                | Dry stone terraces     |
| 21.      | Spain          | Ginés 1999                         | Dry stone terraces     |
| 22.      | Spain          | Segui 1999                         | Dry stone terraces     |
| 23.      | Spain          | Lasanta et al. 2001                | Dry stone terraces     |
| 24.      | Spain          | Sanchez-Maranon et al. 2002        | Dry stone terraces     |
| 25.      | Spain          | Dunjó et al. 2003                  | NA                     |
| 26.      | Spain          | Faulkner et al. 2003               | Dry stone terraces     |
| 27.      | Spain          | Pla and Nacci 2003                 | Mixed                  |
| 28.      | Spain          | Poyatos et al. 2003                | Dry stone terraces     |
| 29.      | Spain          | Bonet 2004                         | NA                     |
| 30.      | Spain          | Duran Zuazo et al. 2004            | Earth embankments      |
| 31.      | Spain          | Duran Zuazo et al. 2005            | Earth embankments      |
| 32.      | Spain          | Arbelo et al. 2006                 | NA                     |
| 33.      | Spain          | Cots-Folch et al. 2006             | Earth embankments      |
| 34.      | Spain          | Martínez-Casasnovas and Ramos 2006 | Earth embankments      |

|     |       |                                  |                    |
|-----|-------|----------------------------------|--------------------|
| 35. | Spain | Arnáez et al. 2007               | NA                 |
| 36. | Spain | Calatrava Leyva et al. 2007      | Dry stone terraces |
| 37. | Spain | Ramos et al. 2007                | Earth embankments  |
| 38. | Spain | Romero Díaz et al. 2007a         | Earth embankments  |
| 39. | Spain | Romero Díaz et al. 2007b         | Earth embankments  |
| 40. | Spain | Olarieta et al. 2008             | Dry stone terraces |
| 41. | Spain | Lesschen 2008                    | Earth embankments  |
| 42. | Spain | Lesschen et al. 2008             | Earth embankments  |
| 43. | Spain | Sauer and Ries 2008              | NA                 |
| 44. | Spain | Seeger and Ries 2008             | Dry stone terraces |
| 45. | Spain | Bellin et al. 2009               | Earth embankments  |
| 46. | Spain | Lesschen et al. 2009             | Earth embankments  |
| 47. | Spain | Meerkerk et al. 2009             | Earth embankments  |
| 48. | Spain | Pleguezuelo et al. 2009          | Earth embankments  |
| 49. | Spain | Sayadi 2009                      | NA                 |
| 50. | Spain | Martínez-Casasnovas et al 2010a  | Earth embankments  |
| 51. | Spain | Martínez-Casasnovas et al. 2010b | Earth embankments  |
| 52. | Spain | Pereira Dra et al. 2010          | Dry stone terraces |
| 53. | Spain | Solé-Benet et al. 2010           | Dry stone terraces |
| 54. | Spain | Duran Zuazo et al. 2011          | Earth embankments  |
| 55. | Spain | Gimenez-Font 2011                | NA                 |
| 56. | Spain | Emran et al. 2012                | NA                 |
| 57. | Spain | Lasanta et al. 2013              | Mixed              |
| 58. | Spain | Otero et al. 2013                | Dry stone terraces |
| 59. | Spain | Diaz-Varela et al. 2014          | NA                 |
| 60. | Spain | Molina et al. 2014               | NA                 |
| 61. | Spain | Puy and Balbo 2013               | Dry stone terraces |
| 62. | Spain | Sitjes 2014                      | Dry stone terraces |
| 63. | Spain | Ramos et al. 2015                | Earth embankments  |
| 64. | Spain | Arévalo et al. 2016              | NA                 |
| 65. | Spain | Asins Velis et al. 2016          | Dry stone terraces |
| 66. | Spain | Cerdà et al. 2016                | NA                 |
| 67. | Spain | Marchamalo et al. 2016           | Dry stone terraces |
| 68. | Spain | Ramos 2016                       | Earth embankments  |
| 69. | Spain | Romero-Martin et al. 2016        | Dry stone terraces |
| 70. | Spain | Arévalo et al. 2017              | NA                 |
| 71. | Spain | Calsamiglia et al. 2017          | Dry stone terraces |

|      |        |                                   |                    |
|------|--------|-----------------------------------|--------------------|
| 72.  | Spain  | García-Comendador et al. 2017     | Dry stone terraces |
| 73.  | Spain  | Lasanta et al. 2017               | Mixed              |
| 74.  | Spain  | Martínez-Hernández et al. 2017    | NA                 |
| 75.  | Spain  | Rodrigo-Comino et al. 2018        | NA                 |
| 76.  | Spain  | Romero Martín et al. 2019         | Dry stone terraces |
| 77.  | France | Tatoni and Roche 1994             | NA                 |
| 78.  | France | Di Pietro 2001                    | NA                 |
| 79.  | France | Acovitsióti-Hameau 2008           | Dry stone terraces |
| 80.  | France | Castex et al. 2008a               | Dry stone terraces |
| 81.  | France | Castex et al. 2008b               | Dry stone terraces |
| 82.  | France | Rendu et al. 2015                 | Mixed              |
| 83.  | France | Bailly and Levavasseur 2012       | NA                 |
| 84.  | Italy  | Galt 1979                         | Dry stone terraces |
| 85.  | Italy  | Terranova 1989                    | Dry stone terraces |
| 86.  | Italy  | Blasi et al. 2000                 | Dry stone terraces |
| 87.  | Italy  | Di Pietro and Filibeck 2000       | Dry stone terraces |
| 88.  | Italy  | Scalenghe et al. 2002             | NA                 |
| 89.  | Italy  | Crosta et al. 2003                | Dry stone terraces |
| 90.  | Italy  | Contessa 2004 (Liguria)           | Dry stone terraces |
| 91.  | Italy  | Contessa 2004 (Tuscany)           | Dry stone terraces |
| 92.  | Italy  | Contessa 2004 (Campania)          | Dry stone terraces |
| 93.  | Italy  | Di Fazio et al. 2005              | Dry stone terraces |
| 94.  | Italy  | Nicolosi et al. 2005              | Dry stone terraces |
| 95.  | Italy  | ARPAV 2006                        | Dry stone terraces |
| 96.  | Italy  | Brancucci and Paliaga 2006        | Dry stone terraces |
| 97.  | Italy  | Cyffka 2006                       | NA                 |
| 98.  | Italy  | Rühl et al. 2006                  | Dry stone terraces |
| 99.  | Italy  | Brandolini et al. 2007            | Dry stone terraces |
| 100. | Italy  | Apuani et al. 2008a               | Dry stone terraces |
| 101. | Italy  | Apuani et al. 2008b               | Dry stone terraces |
| 102. | Italy  | Benetti et al. 2008               | Dry stone terraces |
| 103. | Italy  | Benetti and Patassini 2008        | Dry stone terraces |
| 104. | Italy  | Bonardi 2008                      | Dry stone terraces |
| 105. | Italy  | Brancucci 2008a                   | Dry stone terraces |
| 106. | Italy  | Brancucci 2008b                   | Dry stone terraces |
| 107. | Italy  | Brancucci and Comenale Pinto 2008 | Dry stone terraces |
| 108. | Italy  | Brancucci and Masetti 2008        | Dry stone terraces |

|      |       |                                        |                    |
|------|-------|----------------------------------------|--------------------|
| 109. | Italy | Cevasco and Rollando 2008              | Dry stone terraces |
| 110. | Italy | Chemin and Varotto 2008                | Dry stone terraces |
| 111. | Italy | Di Fazio 2008                          | Dry stone terraces |
| 112. | Italy | Di Fazio and Modica 2008               | Dry stone terraces |
| 113. | Italy | Filesì et al. 2008                     | Dry stone terraces |
| 114. | Italy | Freppaz et al. 2008a                   | NA                 |
| 115. | Italy | Freppaz et al. 2008b                   | Dry stone terraces |
| 116. | Italy | Freppaz et al. 2008c                   | Dry stone terraces |
| 117. | Italy | Garlato and Dalla Rosa 2008            | Dry stone terraces |
| 118. | Italy | Lasen and Fagarazzi 2008               | Dry stone terraces |
| 119. | Italy | Ninfo 2008                             | Dry stone terraces |
| 120. | Italy | Scaramellini 2008                      | NA                 |
| 121. | Italy | Varotto and Ferrarese 2008             | NA                 |
| 122. | Italy | Werder et al. 2008                     | Dry stone terraces |
| 123. | Italy | Barbera et al. 2010                    | Dry stone terraces |
| 124. | Italy | Brandolini 2010                        | Dry stone terraces |
| 125. | Italy | Agnoletti et al. 2011                  | Mixed              |
| 126. | Italy | Cicia et al. 2011                      | NA                 |
| 127. | Italy | Conti et al. 2011                      | Dry stone terraces |
| 128. | Italy | Countryman et al. 2011                 | Dry stone terraces |
| 129. | Italy | Gismondi 2011                          | NA                 |
| 130. | Italy | Koster et al. 2011                     | Dry stone terraces |
| 131. | Italy | Mauro 2011                             | Dry stone terraces |
| 132. | Italy | Barbera and Cullotta 2012              | Dry stone terraces |
| 133. | Italy | Countryman 2012                        | Dry stone terraces |
| 134. | Italy | Di Fazio and Modica 2012               | Dry stone terraces |
| 135. | Italy | Scopesi et al. 2012                    | NA                 |
| 136. | Italy | Preti et al. 2013                      | Dry stone terraces |
| 137. | Italy | Camera et al. 2014                     | Dry stone terraces |
| 138. | Italy | Modica et al. 2014                     | Dry stone terraces |
| 139. | Italy | Savo et al. 2014                       | Mixed              |
| 140. | Italy | Sofia et al. 2014                      | NA                 |
| 141. | Italy | Tarolli et al. 2014 (Liguria, Tuscany) | Dry stone terraces |
| 142. | Italy | Tarolli et al. 2014 (Campania)         | Dry stone terraces |
| 143. | Italy | Van der Sluis et al. 2014              | Mixed              |
| 144. | Italy | Camera et al. 2015                     | Dry stone terraces |
| 145. | Italy | Agnoletti et al. 2015a                 | Dry stone terraces |

|      |          |                              |                    |
|------|----------|------------------------------|--------------------|
| 146. | Italy    | Agnoletti et al. 2015c       | Dry stone terraces |
| 147. | Italy    | Agnoletti et al. 2015d       | Dry stone terraces |
| 148. | Italy    | Mauro 2015                   | Dry stone terraces |
| 149. | Italy    | Stempfle 2015                | Dry stone terraces |
| 150. | Italy    | Tarolli et al. 2015          | Mixed              |
| 151. | Italy    | Paliaga et al. 2016          | Dry stone terraces |
| 152. | Italy    | Wilson et al. 2016           | NA                 |
| 153. | Italy    | Bini et al. 2017             | Dry stone terraces |
| 154. | Italy    | Garini et al. 2017           | Dry stone terraces |
| 155. | Italy    | Modica et al. 2017           | Dry stone terraces |
| 156. | Italy    | Scopesi et al. 2017          | Dry stone terraces |
| 157. | Italy    | Brandolini et al. 2018       | Dry stone terraces |
| 158. | Italy    | Brunori et al. 2018          | Dry stone terraces |
| 159. | Italy    | Capolupo et al. 2018a        | Dry stone terraces |
| 160. | Italy    | Capolupo et al. 2018b        | Dry stone terraces |
| 161. | Italy    | De Pasquale 2018             | Dry stone terraces |
| 162. | Italy    | Ferrarese et al. 2018        | Mixed              |
| 163. | Italy    | Perlotto and D'Agostino 2018 | Dry stone terraces |
| 164. | Italy    | Preti et al. 2018a           | Dry stone terraces |
| 165. | Italy    | Preti et al. 2018b           | Dry stone terraces |
| 166. | Italy    | Terkenli et al. 2018         | Dry stone terraces |
| 167. | Italy    | Agnoletti et al. 2019        | Dry stone terraces |
| 168. | Italy    | Pijl et al. 2019             | Dry stone terraces |
| 169. | Italy    | Torquati et al. 2019         | Dry stone terraces |
| 170. | Slovenia | Rusjan et al. 2007           | NA                 |
| 171. | Slovenia | Momirski 2008                | Earth embankments  |
| 172. | Slovenia | Momirski et al. 2008         | Earth embankments  |
| 173. | Slovenia | Momirski and Kladnik 2009    | Earth embankments  |
| 174. | Slovenia | Momirski and Gabrovec 2014   | Mixed              |
| 175. | Slovenia | Momirski and Kladnik 2015    | Mixed              |
| 176. | Slovenia | Kokalj 2015                  | NA                 |
| 177. | Slovenia | Komac and Zorn 2008          | NA                 |
| 178. | Slovenia | Berčič 2016                  | Mixed              |
| 179. | Slovenia | Momirski and Berčič 2016     | Mixed              |
| 180. | Slovenia | Kladnik et al. 2016          | Mixed              |
| 181. | Slovenia | Kladnik et al. 2017          | Mixed              |
| 182. | Slovenia | Pipan and Kokalj 2017        | Earth embankments  |

|      |            |                           |                    |
|------|------------|---------------------------|--------------------|
| 183. | Slovenia   | Momirski 2017             | NA                 |
| 184. | Slovenia   | Šmid Hribar et al. 2017   | Mixed              |
| 185. | Croatia    | Slapšak et al. 1998       | Dry stone terraces |
| 186. | Croatia    | Aničić et al. 2016        | Dry stone terraces |
| 187. | Croatia    | Andlar et al. 2017        | Mixed              |
| 188. | Croatia    | Andlar et al. 2018        | Mixed              |
| 189. | Croatia    | Andlar and Aničić, 2018   | Mixed              |
| 190. | Albania    | Kullaj et al. 2012        | Dry stone terraces |
| 191. | Montenegro | Curovic et al. 2019       | Dry stone terraces |
| 192. | Malta      | Rolè and Attard 2004      | Dry stone terraces |
| 193. | Malta      | Rolè et al. 2005          | Dry stone terraces |
| 194. | Malta      | Cyffka 2006               | Dry stone terraces |
| 195. | Malta      | Rolè 2007                 | Dry stone terraces |
| 196. | Malta      | Cyffka and Bock 2008      | Dry stone terraces |
| 197. | Malta      | Rolè and Attard 2008      | Dry stone terraces |
| 198. | Cyprus     | Fall et al. 2012          | Dry stone terraces |
| 199. | Cyprus     | Galletti et al. 2013      | Dry stone terraces |
| 200. | Cyprus     | Zoumides et al. 2015      | Dry stone terraces |
| 201. | Cyprus     | Camera et al. 2016        | Dry stone terraces |
| 202. | Cyprus     | Djuma et al. 2016         | Dry stone terraces |
| 203. | Cyprus     | Camera et al. 2017        | Dry stone terraces |
| 204. | Cyprus     | Djuma et al. 2017         | Dry stone terraces |
| 205. | Cyprus     | Ridder et al. 2017        | Dry stone terraces |
| 206. | Cyprus     | Zoumides et al. 2017a     | Dry stone terraces |
| 207. | Cyprus     | Zoumides et al. 2017b     | Dry stone terraces |
| 208. | Cyprus     | Camera et al. 2018        | Dry stone terraces |
| 209. | Cyprus     | Djuma et al. 2018         | Dry stone terraces |
| 210. | Greece     | Moody and Groove 1990     | Mixed              |
| 211. | Greece     | Boix et al. 1995          | NA                 |
| 212. | Greece     | French and Whitelaw 1999  | Dry stone terraces |
| 213. | Greece     | Bevan et al. 2003         | Dry stone terraces |
| 214. | Greece     | Bevan and Conolly 2004    | Dry stone terraces |
| 215. | Greece     | Siebert 2004              | Dry stone terraces |
| 216. | Greece     | Kizos and Koulouri 2005   | Dry stone terraces |
| 217. | Greece     | Price and Nixon 2005      | Dry stone terraces |
| 218. | Greece     | Kizos and Koulouri 2006   | Dry stone terraces |
| 219. | Greece     | Koulouri and Giourga 2007 | Dry stone terraces |

|      |         |                                  |                    |
|------|---------|----------------------------------|--------------------|
| 220. | Greece  | Petropoulou 2006                 | Earth embankments  |
| 221. | Greece  | Papanastasis 2007                | Dry stone terraces |
| 222. | Greece  | Petropoulou 2007                 | Earth embankments  |
| 223. | Greece  | Giourga et al. 2008              | NA                 |
| 224. | Greece  | Krahtopoulou and Frederick 2008  | Dry stone terraces |
| 225. | Greece  | Petanidou et al. 2008            | Dry stone terraces |
| 226. | Greece  | Kizos and Koulouri 2010          | Dry stone terraces |
| 227. | Greece  | Kizos et al. 2010a               | Dry stone terraces |
| 228. | Greece  | Kizos et al. 2010b               | Dry stone terraces |
| 229. | Greece  | Palmer et al. 2010               | Dry stone terraces |
| 230. | Greece  | Bevan and Conolly 2011           | Dry stone terraces |
| 231. | Greece  | Tsermegas et al. 2011            | Dry stone terraces |
| 232. | Greece  | Tzanopoulos and Vogiatzakis 2011 | NA                 |
| 233. | Greece  | Kvapil 2012                      | Dry stone terraces |
| 234. | Greece  | Bevan et al. 2013                | Dry stone terraces |
| 235. | Greece  | Van der Sluis et al. 2014        | Dry stone terraces |
| 236. | Greece  | Terkenli et al. 2018             | Dry stone terraces |
| 237. | Turkey  | Satici 2013                      | Dry stone terraces |
| 238. | Syria   | Masri and Zobisch 2007           | Dry stone terraces |
| 239. | Lebanon | Talhok et al. 2005               | NA                 |
| 240. | Israel  | Aharoni et al. 1960              | Dry stone terraces |
| 241. | Israel  | Ron 1966                         | Dry stone terraces |
| 242. | Israel  | De Geus et al. 1975              | Dry stone terraces |
| 243. | Israel  | Edelstein and Kislev 1981        | Dry stone terraces |
| 244. | Israel  | Stager 1982                      | Dry stone terraces |
| 245. | Israel  | Gibson and Edelstein 1985        | Dry stone terraces |
| 246. | Israel  | Ron 1985                         | Dry stone terraces |
| 247. | Israel  | Ackermann et al. 2005            | Dry stone terraces |
| 248. | Israel  | Zgaier and Inbar 2005            | Dry stone terraces |
| 249. | Israel  | Bruins 2007                      | Dry stone terraces |
| 250. | Israel  | Ackermann et al. 2008            | Dry stone terraces |
| 251. | Israel  | Zgaier 2008                      | Dry stone terraces |
| 252. | Israel  | Ashkenazi et al. 2012            | Dry stone terraces |
| 253. | Israel  | Bruins 2012                      | Dry stone terraces |
| 254. | Israel  | Bruins and Jongmans 2012         | Dry stone terraces |
| 255. | Israel  | Davidovich et al. 2012           | Dry stone terraces |
| 256. | Israel  | Haiman 2012                      | Dry stone terraces |

|      |           |                              |                    |
|------|-----------|------------------------------|--------------------|
| 257. | Israel    | Ore and Bruins 2012          | Dry stone terraces |
| 258. | Israel    | Avni et al. 2013             | Dry stone terraces |
| 259. | Israel    | Van Asperen et al. 2014      | Dry stone terraces |
| 260. | Israel    | Ashkenazi et al. 2015        | Dry stone terraces |
| 261. | Israel    | Gibson 2015                  | Dry stone terraces |
| 262. | Israel    | Gadot et al. 2016a           | Dry stone terraces |
| 263. | Israel    | Gadot et al. 2016b           | Dry stone terraces |
| 264. | Israel    | Inbar and Zgaier 2016        | Dry stone terraces |
| 265. | Israel    | Gibson and Lewis 2017        | Dry stone terraces |
| 266. | Israel    | Stavi et al. 2017            | Dry stone terraces |
| 267. | Israel    | Porat et al. 2018            | Dry stone terraces |
| 268. | Israel    | Stavi et al. 2018            | Dry stone terraces |
| 269. | Israel    | Ackermann et al. 2019        | Dry stone terraces |
| 270. | Israel    | Stavi et al. 2019            | Dry stone terraces |
| 271. | Palestine | Strahorn 1929                | Dry stone terraces |
| 272. | Palestine | Sayej 1999                   | Dry stone terraces |
| 273. | Palestine | Hammad et al. 2004           | Dry stone terraces |
| 274. | Palestine | Ghadban 2015                 | Dry stone terraces |
| 275. | Palestine | Gibson 2015                  | Dry stone terraces |
| 276. | Palestine | Hammad and Børresen 2006     | Dry stone terraces |
| 277. | Palestine | Al-Houdalieh et al. 2013     | Dry stone terraces |
| 278. | Palestine | Gibson and Lewis 2017        | Dry stone terraces |
| 279. | Libya     | Gilbertson and Chisholm 1976 | Dry stone terraces |
| 280. | Tunisia   | Missaoui 1996                | Mixed              |
| 281. | Tunisia   | Fleskens et al. 2005         | Dry stone terraces |
| 282. | Tunisia   | Schiettecatte et al. 2005    | NA                 |
| 283. | Tunisia   | Al Ali et al. 2008           | Earth embankments  |
| 284. | Tunisia   | Gabriels et al. 2009         | Dry stone terraces |
| 285. | Tunisia   | Ouessar et al. 2009          | Dry stone terraces |
| 286. | Tunisia   | Khelifa et al. 2016          | Earth embankments  |
| 287. | Tunisia   | Khelifa et al. 2017          | Earth embankments  |
| 288. | Morocco   | Bencherifa 1983              | NA                 |
| 289. | Morocco   | Barrow and Hicham 2000       | Dry stone terraces |
| 290. | Morocco   | Khalil 2004                  | NA                 |
| 291. | Morocco   | Montanari 2013               | Dry stone terraces |
| 292. | Morocco   | Agnoletti et al. 2015b       | Wood embankments   |
| 293. | Morocco   | Ziyadi et al. 2019           | Dry stone terraces |



**Table S2. Type of terraces (embankments)**

| Embankments, walls | References                                                                                                                                                                                                                                                                                                                                                                                                                                                                                                                                                                                                                                                                                                                                                                                                                                                                                                                                                                                                                                                                                                                                                                                                                                                                                                                                                                                                                                                                                                                                                                                                                                                                                                                                                                                                                                                                                                                                                                                                                                                                                                                                                                                                                                                                                                                                                                                                                                                                                                                                                                                                                                                                                                                                                                                                                                                                                                                                                                                                                                                                                                                                                                                                                                                                                                                                                                                                                                                                                                                                                                                                                                                                                                                                                                                                                                                                                                                                                                                                                                                                                                                                               |
|--------------------|----------------------------------------------------------------------------------------------------------------------------------------------------------------------------------------------------------------------------------------------------------------------------------------------------------------------------------------------------------------------------------------------------------------------------------------------------------------------------------------------------------------------------------------------------------------------------------------------------------------------------------------------------------------------------------------------------------------------------------------------------------------------------------------------------------------------------------------------------------------------------------------------------------------------------------------------------------------------------------------------------------------------------------------------------------------------------------------------------------------------------------------------------------------------------------------------------------------------------------------------------------------------------------------------------------------------------------------------------------------------------------------------------------------------------------------------------------------------------------------------------------------------------------------------------------------------------------------------------------------------------------------------------------------------------------------------------------------------------------------------------------------------------------------------------------------------------------------------------------------------------------------------------------------------------------------------------------------------------------------------------------------------------------------------------------------------------------------------------------------------------------------------------------------------------------------------------------------------------------------------------------------------------------------------------------------------------------------------------------------------------------------------------------------------------------------------------------------------------------------------------------------------------------------------------------------------------------------------------------------------------------------------------------------------------------------------------------------------------------------------------------------------------------------------------------------------------------------------------------------------------------------------------------------------------------------------------------------------------------------------------------------------------------------------------------------------------------------------------------------------------------------------------------------------------------------------------------------------------------------------------------------------------------------------------------------------------------------------------------------------------------------------------------------------------------------------------------------------------------------------------------------------------------------------------------------------------------------------------------------------------------------------------------------------------------------------------------------------------------------------------------------------------------------------------------------------------------------------------------------------------------------------------------------------------------------------------------------------------------------------------------------------------------------------------------------------------------------------------------------------------------------------------------|
| Dry stone walls    | <p><b>Before 2000 (TOT=26):</b> Strahorn 1929; Hayes 1956; Aharoni et al. 1960; Stanislawski 1962; Ron 1966; De Geus 1975; Gilbertson and Chisholm 1976; Galt 1979; Edelstein and Kislev 1981; Stager 1982; Gibson and Edelstein 1985; Ron 1985; Terranova 1989; Grimalt et al. 1992; Llorens et al. 1992; Douglas et al. 1994; Gallart et al. 1994; Douglas et al. 1996; Ramos and Porta 1997; Estabrook 1998; Ruecker et al. 1998; Slapšak et al. 1998; French and Whitelaw 1999; Ginés 1999; Sayej 1999; Segui 1999</p> <p><b>2000-2010 (TOT=77):</b> Barrow and Hicham 2000; Blasi et al. 2000; Di Pietro and Filibeck 2000; Lasanta et al. 2001; Sanchez-Maranon et al. 2002; Bevan et al. 2003; Crosta et al. 2003; Faulkner et al. 2003; Poyatos et al. 2003; Bevan and Conolly 2004; Contessa 2004; Hammad et al. 2004; Rolè and Attard 2004; Siebert 2004; Ackermann et al. 2005; Di Fazio et al. 2005; Fleskens et al. 2005; Kizos and Koulouri 2005; Nicolosi et al. 2005; Price and Nixon 2005; Rolè et al. 2005; Zgaier and Inbar 2005; ARPAV 2006; Brancucci and Paliaga 2006; Cyffka 2006 (Malta); Kizos and Koulouri 2006; Hammad and Børresen 2006; Rühl et al. 2006; Brandolini et al. 2007; Bruins 2007; Calatrava Leyva et al. 2007; Estabrook 2007; Koulouri and Giourga 2007; Masri and Zobisch 2007; Papanastasis 2007; Rolé 2007; Acovitsiōti-Hameau 2008; Ackermann et al. 2008; Apuani et al. 2008a; Apuani et al. 2008b; Benetti et al. 2008; Benetti and Patassini 2008; Bonardi 2008; Brancucci 2008a; Brancucci 2008b; Brancucci and Comenale Pinto 2008; Brancucci and Masetti 2008; Castex et al. 2008a; Castex et al. 2008b; Cevasco and Rollando 2008; Chemin and Varotto 2008; Cyffka and Bock 2008; Di Fazio 2008; Di Fazio and Modica 2008; Filesi et al. 2008; Freppaz et al. 2008b; Freppaz et al. 2008c; Garlato and Dalla Rosa 2008; Krahtopoulou and Frederick 2008; Lasen and Fagarazzi 2008; Ninfo 2008; Olarieta et al. 2008; Petanidou et al. 2008; Rolè and Attard 2008; Seeger and Ries 2008; Werder et al. 2008; Zgaier 2008; Gabriels et al. 2009; Ouessar et al. 2009; Barbera et al. 2010; Brandolini 2010; Kizos and Koulouri 2010; Kizos et al. 2010a; Kizos et al. 2010b; Palmer et al. 2010; Pereira Dra et al. 2010; Solé-Benet et al. 2010</p> <p><b>2011-2020 (TOT=91):</b> Bevan and Conolly 2011; Conti et al. 2011; Countryman et al. 2011; Koster et al. 2011; Mauro 2011; Tsermegas et al. 2011; Ashkenazi et al. 2012; Barbera and Cullotta 2012; Bruins 2012; Bruins and Jongmans 2012; Countryman 2012; Davidovich et al. 2012; Di Fazio and Modica 2012; Fall et al. 2012; Haiman 2012; Kullaj et al. 2012; Kvapil 2012; Ore and Bruins 2012; Al-Houdalieh et al. 2013; Avni et al. 2013; Bevan et al. 2013; Galletti et al. 2013; Montanari 2013; Otero et al. 2013; Preti et al. 2013; Puy and Balbo 2013; Satici 2013; Camera et al. 2014; Modica et al. 2014; Sitjes 2014; Tarolli et al. 2014; Van Asperen et al. 2014; Van der Sluis et al. 2014 (Greece); Agnoletti et al. 2015a; Agnoletti et al. 2015c; Agnoletti et al. 2015d; Ashkenazi et al. 2015; Camera et al. 2015; Stempfle 2015; Ghadban 2015; Gibson 2015; Mauro 2015; Nunes et al. 2015; Zoumides et al. 2015; Aničić et al. 2016; Asins-Velis et al. 2016; Camera et al. 2016; Djuma et al. 2016; Gadot et al. 2016a; Gadot et al. 2016b; Inbar and Zgaier 2016; Marchamalo et al. 2016; Paliaga et al. 2016; Romero-Martin et al. 2016; Bini et al. 2017; Calsamiglia et al. 2017; Camera et al. 2017; Djuma et al. 2017; García-Comendador et al. 2017; Garini et al. 2017; Gibson and Lewis 2017; Kiesow and Bork 2017; Modica et al. 2017; Ridder et al. 2017; Scopesi et al. 2017; Stavi et al. 2017; Zoumides et al. 2017a; Zoumides et al. 2017b; Andlar and Aničić, 2018; Brandolini et al. 2018; Brunori et al. 2018; Camera et al. 2018; Capolupo et al. 2018a; Capolupo et al. 2018b; De Pasquale 2018; Djuma et al. 2018; Nunes et al. 2018; Perlotto and D'Agostino 2018; Porat et al. 2018; Preti et al. 2018a; Preti et al. 2018b; Stavi et al. 2018; Terkenli et al. 2018; Ackermann et al.</p> |

|                                      |                                                                                                                                                                                                                                                                                                                                                                                                                                                                                                                                                                                                                                                                                                                                                                                                                                                                                                                                                                                      |
|--------------------------------------|--------------------------------------------------------------------------------------------------------------------------------------------------------------------------------------------------------------------------------------------------------------------------------------------------------------------------------------------------------------------------------------------------------------------------------------------------------------------------------------------------------------------------------------------------------------------------------------------------------------------------------------------------------------------------------------------------------------------------------------------------------------------------------------------------------------------------------------------------------------------------------------------------------------------------------------------------------------------------------------|
|                                      | 2019; Agnoletti et al. 2019; Romero Martín et al. 2019; Curovic et al. 2019; Pijl et al. 2019; Stavi et al. 2019; Torquati et al. 2019; Ziyadi et al. 2019                                                                                                                                                                                                                                                                                                                                                                                                                                                                                                                                                                                                                                                                                                                                                                                                                           |
| Earth embankments                    | <p><b>Before 2000:</b> NA</p> <p><b>2000-2010 (TOT=22):</b> Oliveira et al.2001; Duran Zuazo et al. 2004; Duran Zuazo et al. 2005; Cots-Folch et al 2006; Martínez-Casasnovas and Ramos 2006; Petropoulou 2006; Petropoulou 2007; Romero Díaz et al. 2007a; Romero Díaz et al. 2007b; Ramos et al. 2007; Al Ali et al. 2008; Lesschen 2008; Lesschen et al. 2008; Momirski 2008; Momirski et al. 2008; Bellin et al. 2009; Lesschen et al. 2009; Meerkerk et al. 2009; Momirski and Kladnik 2009; Pleguezuelo et al. 2009; Martínez-Casasnovas et al 2010a; Martínez-Casasnovas et al 2010b;</p> <p><b>2011-2020 (TOT=8):</b> Duran Zuazo et al. 2011; Ramos et al. 2015; Khelifa et al. 2016; Ramos 2016; Fernandes et al. 2017a; Fernandes et al. 2017b; Khelifa et al. 2017; Pipan and Kokalj 2017</p>                                                                                                                                                                            |
| Wood embankments                     | <p><b>Before 2000:</b> NA</p> <p><b>2000-2010:</b> NA</p> <p><b>2011-2020 (TOT=1):</b> Agnoletti et al. 2015b</p>                                                                                                                                                                                                                                                                                                                                                                                                                                                                                                                                                                                                                                                                                                                                                                                                                                                                    |
| Mixed: dry stones, earth embankments | <p><b>Before 2000 (TOT=2):</b> Moody and Groove 1990; Missaoui 1996;</p> <p><b>2000-2010 (TOT=1):</b> Pla and Nacci 2003;</p> <p><b>2011-2020 (TOT=18):</b> Agnoletti et al. 2011; Lasanta et al. 2013; Momirski and Gabrovec 2014; Savo et al. 2014; Van der Sluis et al. 2014 (Italy); Momirski and Kladnik 2015; Rendu et al. 2015; Tarolli et al. 2015; Berčič 2016; Kladnik et al. 2016; Kladnik et al. 2017; Momirski and Berčič 2016; Faria et al. 2017; Andlar et al. 2017; Lasanta et al. 2017; Šmid Hribar et al. 2017; Andlar et al. 2018; Ferrarese et al. 2018;</p>                                                                                                                                                                                                                                                                                                                                                                                                     |
| Not available                        | <p><b>Before 2000 (TOT=4):</b> Bencherifa 1983; Magalães et al. 1985; Tatoni and Roche 1994; Boix et al. 1995;</p> <p><b>2000-2010 (TOT=19):</b> Di Pietro 2001; Scalenghe et al. 2002; Dunjó et al. 2003; Bonet 2004; Khalil 2004; Schiettecatte et al. 2005; Talhouk et al. 2005; Arbelo et al. 2006; Cyffka 2006 (Italy); Arnáez et al. 2007; Rusjan et al. 2007; Freppaz et al. 2008a; Giourga et al. 2008; Komac and Zorn 2008; Sauer and Ries 2008; Scaramellini 2008; Varotto and Ferrarese 2008; Pereira et al. 2009; Sayadi 2009;</p> <p><b>2011-2020 (TOT=18):</b> Cicia et al. 2011; Gimenez-Font 2011; Gismondi 2011; Tzanopoulos and Vogiatzakis 2011; Bailly and Levavasseur 2012; Emran et al. 2012; Scopesi et al. 2012; Diaz-Varela et al. 2014; Molina et al. 2014; Sofia et al. 2014; Kokalj 2015; Arévalo et al. 2016; Cerdà et al. 2016; Wilson et al. 2016; Arévalo et al. 2017; Martínez-Hernández et al. 2017; Momirski 2017; Rodrigo-Comino et al. 2018</p> |

**Table S3. Main focus and other features of the analyzed papers.**

| Focus of the paper                                   |                                                                          | References                                                                                                                                                                                                                                                                                                                                                                                                                                                                                                                                                                                                                                                                                                                                                                                                                                                                                                                                                                                                                                                                                                                                                                                                                                                                                                                                                              |
|------------------------------------------------------|--------------------------------------------------------------------------|-------------------------------------------------------------------------------------------------------------------------------------------------------------------------------------------------------------------------------------------------------------------------------------------------------------------------------------------------------------------------------------------------------------------------------------------------------------------------------------------------------------------------------------------------------------------------------------------------------------------------------------------------------------------------------------------------------------------------------------------------------------------------------------------------------------------------------------------------------------------------------------------------------------------------------------------------------------------------------------------------------------------------------------------------------------------------------------------------------------------------------------------------------------------------------------------------------------------------------------------------------------------------------------------------------------------------------------------------------------------------|
| Analysis of the changed conditions after abandonment | Soil features and development, water runoff (i.e., degradation, erosion) | <p><b>Before 2000 (TOT=7):</b> Strahorn 1929; Llorens et al. 1992; Gallart et al. 1994; Boix et al. 1995; Estabrook 1998; Ruecker et al. 1998; French and Whitelaw 1999;</p> <p><b>2000-2010 (TOT=21):</b> Lasanta et al. 2001; Dunjó et al. 2003; Faulkner et al. 2003; Zgaier and Inbar 2005; Arbelo et al. 2006; ARPAV 2006; Koulouri and Giourga 2007; Romero Díaz et al. 2007a; Romero Díaz et al. 2007b; Ackermann et al. 2008; Apuani et al. 2008b; Brancucci and Masetti 2008; Cyffka and Bock 2008; Freppaz et al. 2008c; Krahtopoulou and Frederick 2008; Lesschen 2008; Lesschen et al. 2008; Seeger and Ries 2008; Bellin et al. 2009; Lesschen et al. 2009; Solé-Benet et al. 2010;</p> <p><b>2011-2020 (TOT=28):</b> Bevan and Conolly 2011; Bruins and Jongmans 2012; Emran et al. 2012; Scopesi et al. 2012; Bevan et al. 2013; Lasanta et al. 2013; Puy and Balbo 2013; Molina et al. 2014; Tarolli et al. 2014; Van Asperen et al. 2014; Camera et al. 2016; Cerdà et al. 2016; Inbar and Zgaier 2016; Arévalo et al. 2017; Bini et al. 2017; Camera et al. 2017; Djuma et al. 2017; García-Comendador et al. 2017; Martínez-Hernández et al. 2017; Scopesi et al. 2017; Stavi et al. 2017; Zoumides et al. 2017a; Brandolini et al. 2018; Camera et al. 2018; Rodrigo-Comino et al. 2018; Stavi et al. 2018; Pijl et al. 2019; Stavi et al. 2019</p> |
|                                                      | Vegetation features and dynamics                                         | <p><b>Before 2000 (TOT=4):</b> Tatoni and Roche 1994; Douglas et al. 1996; Ruecker et al. 1998; Ginés 1999;</p> <p><b>2000-2010 (TOT=17):</b> Blasi et al. 2000; Di Pietro and Filibeck 2000; Poyatos et al. 2003; Bonet 2004; Siebert 2004; Talhouk et al. 2005; Arbelo et al. 2006; Cyffka 2006; Rühl et al. 2006; Estabrook 2007; Koulouri and Giourga 2007; Cyffka and Bock 2008; Filesi et al. 2008; Lesschen 2008; Sauer and Ries 2008; Barbera et al. 2010; Palmer et al. 2010;</p> <p><b>2011-2020 (TOT=6):</b> Bevan et al. 2013; Lasanta et al. 2013; Ashkenazi et al. 2015; Arévalo et al. 2016; Arévalo et al. 2017; Stavi et al. 2018</p>                                                                                                                                                                                                                                                                                                                                                                                                                                                                                                                                                                                                                                                                                                                  |
|                                                      | Historical land-use changes (including archaeological studies)           | <p><b>Before 2000 (TOT=9):</b> Aharoni et al. 1960; Edelstein and Kislev 1981; Stager 1982; Gibson and Edelstein 1985; Terranova 1989; Douglas et al. 1994; Douglas et al. 1996; Sayej 1999; Slapšak et al. 1998;</p> <p><b>2000-2010 (TOT=13):</b> Lasanta et al. 2001; Dunjó et al. 2003; Poyatos et al. 2003; Di Fazio et al. 2005; Kizos and Koulouri 2005; Price and Nixon 2005; Kizos and Koulouri 2006; Di Fazio and Modica 2008; Freppaz et al. 2008a; Krahtopoulou and Frederick 2008; Olarieta et al. 2008; Petanidou et al. 2008; Pereira Dra et al. 2010;</p> <p><b>2011-2020 (TOT=36):</b> Agnoletti et al. 2011; Bevan and Conolly 2011; Countryman et al. 2011; Gimenez-Font 2011; Mauro 2011; Tzanopoulos and Vogiatzakis 2011; Bruins 2012; Countryman 2012; Di Fazio and Modica 2012; Fall et al. 2012; Haiman 2012; Kvapil 2012; Scopesi et al. 2012; Avni et al. 2013; Bevan et al. 2013; Puy and Balbo 2013; Modica et al. 2014; Momirski and</p>                                                                                                                                                                                                                                                                                                                                                                                                  |

|                                                                                          |                                                 |                                                                                                                                                                                                                                                                                                                                                                                                                                                                                                                                                                                                                                                                                                                                                                                                                                                                                                                                                                                                                                                                                                                                                                                                                                                                                                                                                                                                    |
|------------------------------------------------------------------------------------------|-------------------------------------------------|----------------------------------------------------------------------------------------------------------------------------------------------------------------------------------------------------------------------------------------------------------------------------------------------------------------------------------------------------------------------------------------------------------------------------------------------------------------------------------------------------------------------------------------------------------------------------------------------------------------------------------------------------------------------------------------------------------------------------------------------------------------------------------------------------------------------------------------------------------------------------------------------------------------------------------------------------------------------------------------------------------------------------------------------------------------------------------------------------------------------------------------------------------------------------------------------------------------------------------------------------------------------------------------------------------------------------------------------------------------------------------------------------|
|                                                                                          |                                                 | Gabrovec 2014; Van der Sluis et al. 2014 (Greece); Ashkenazi et al. 2015; Mauro 2015; Momirski and Kladnik 2015; Rendu et al. 2015; Gadot et al. 2016a; Gadot et al. 2016b; Kladnik et al. 2016; Modica et al. 2017; Ridder et al. 2017; Scopesi et al. 2017; Stavi et al. 2017; Brunori et al. 2018; Capolupo et al. 2018a; Capolupo et al. 2018b; De Pasquale 2018; Porat et al. 2018; Romero Martín et al. 2019                                                                                                                                                                                                                                                                                                                                                                                                                                                                                                                                                                                                                                                                                                                                                                                                                                                                                                                                                                                 |
|                                                                                          | Strategies for requalification                  | <b>Before 2000:</b> NA<br><b>2000-2010 (TOT=10):</b> Nicolosi et al. 2005; ARPAV 2006; Di Fazio 2008; Papanastasis 2007; Benetti et al. 2008; Benetti and Patassini 2008; Castex et al. 2008a; Cevasco and Rollando 2008; Di Fazio and Modica 2008; Werder et al. 2008<br><b>2011-2020 (TOT=3):</b> Di Fazio and Modica 2012; Zoumides et al. 2015; Zoumides et al. 2017a;                                                                                                                                                                                                                                                                                                                                                                                                                                                                                                                                                                                                                                                                                                                                                                                                                                                                                                                                                                                                                         |
|                                                                                          | Terrace stability and risk assessment           | <b>Before 2000:</b> NA<br><b>2000-2010 (TOT=12):</b> Contessa 2004 (Liguria); Zgaier and Inbar 2005; Apuani et al. 2008b; Brancucci 2008a; Lesschen 2008; Lesschen et al. 2008; Zgaier 2008; Bellin et al. 2009; Meerkerk et al. 2009; Brancucci and Paliaga 2006; Kizos and Koulouri 2010; Solé-Benet et al. 2010;<br><b>2011-2020 (TOT=9):</b> Scopesi et al. 2012; Tarolli et al. 2014 (Tuscany); Van der Sluis et al. 2014; Djuma et al. 2016; Calsamiglia et al. 2017; Scopesi et al. 2017; Brandolini et al. 2018; Perlotto and D'Agostino 2018; Agnoletti et al. 2019;                                                                                                                                                                                                                                                                                                                                                                                                                                                                                                                                                                                                                                                                                                                                                                                                                      |
| <b>Analysis of a variety of environmental conditions of actively cultivated terraces</b> | Soil properties and erosion, water conservation | <b>Before 2000 (TOT=6):</b> Strahorn 1929; Magalães et al. 1985; Terranova 1989; Missaoui 1996; Ramos and Porta 1997; Estabrook 1998;<br><b>2000-2010 (TOT=24):</b> Oliveira et al. 2001; Sanchez-Maranon et al. 2002; Scalenghe et al., 2002; Dunjó et al. 2003; Pla and Nacci 2003; Duran Zuazo et al. 2004; Hammad et al. 2004; Duran Zuazo et al. 2005; Fleskens et al. 2005; Schiettecatte et al. 2005; Cots-Folch et al. 2006; Hammad and Børresen 2006; Martínez-Casasnovas and Ramos 2006; Arnáez et al. 2007; Koulouri and Giourga 2007; Rusjan et al. 2007; Al Ali et al. 2008; Freppaz et al. 2008c; Garlato and Dalla Rosa 2008; Rolè and Attard 2008; Gabriels et al. 2009; Ouessar et al. 2009; Pleguezuelo et al. 2009; Martínez-Casasnovas et al. 2010a;<br><b>2011-2020 (TOT=27):</b> Duran Zuazo et al. 2011; Koster et al. 2011; Tsermegas et al. 2011; Camera et al. 2015; Nunes et al. 2015; Ramos et al. 2015; Tarolli et al. 2015; Cerdà et al. 2016; Khelifa et al. 2016; Inbar and Zgaier 2016; Marchamalo et al. 2016; Ramos 2016; Bini et al. 2017; Camera et al. 2017; Fernandes et al. 2017a; Fernandes et al. 2017b; Khelifa et al. 2017; Kiesow and Bork 2017; Martínez-Hernández et al. 2017; Brunori et al. 2018; Camera et al. 2018; Djuma et al. 2018; Nunes et al. 2018; Preti et al. 2018a; Preti et al. 2018b; Rodrigo-Comino et al. 2018; Pijl et al. 2019; |
|                                                                                          | Wall and terrace stability                      | <b>Before 2000:</b> NA<br><b>2000-2010 (TOT=4):</b> Contessa 2004 (Tuscany, Campania); Savo et al. 2014; Ramos et al. 2007; Ninfo 2008;                                                                                                                                                                                                                                                                                                                                                                                                                                                                                                                                                                                                                                                                                                                                                                                                                                                                                                                                                                                                                                                                                                                                                                                                                                                            |

|                           |                                                      |                                                                                                                                                                                                                                                                                                                                                                                                                                                                                                                                                                                                                                                                                                                                                                                                                                                                                                                                                                                                                                                                                                                                                                                                                                                                                                                                                                                                                                                                                                                                                                  |
|---------------------------|------------------------------------------------------|------------------------------------------------------------------------------------------------------------------------------------------------------------------------------------------------------------------------------------------------------------------------------------------------------------------------------------------------------------------------------------------------------------------------------------------------------------------------------------------------------------------------------------------------------------------------------------------------------------------------------------------------------------------------------------------------------------------------------------------------------------------------------------------------------------------------------------------------------------------------------------------------------------------------------------------------------------------------------------------------------------------------------------------------------------------------------------------------------------------------------------------------------------------------------------------------------------------------------------------------------------------------------------------------------------------------------------------------------------------------------------------------------------------------------------------------------------------------------------------------------------------------------------------------------------------|
|                           |                                                      | <b>2011-2020 (TOT=8):</b> Tsermegas et al. 2011; Preti et al. 2013; Camera et al. 2015; Tarolli et al. 2015; Preti et al. 2018a; Preti et al. 2018b; Agnoletti et al. 2015c; Agnoletti et al. 2019                                                                                                                                                                                                                                                                                                                                                                                                                                                                                                                                                                                                                                                                                                                                                                                                                                                                                                                                                                                                                                                                                                                                                                                                                                                                                                                                                               |
|                           | Evaluates Landslide Susceptibility                   | <b>Before 2000:</b> NA<br><b>2000-2010 (TOT=4):</b> Crosta et al. 2003; Savo et al. 2014; Komac and Zorn 2008; Pereira et al. 2009;<br><b>2011-2020 (TOT=2):</b> Camera et al. 2014; Faria et al. 2017                                                                                                                                                                                                                                                                                                                                                                                                                                                                                                                                                                                                                                                                                                                                                                                                                                                                                                                                                                                                                                                                                                                                                                                                                                                                                                                                                           |
|                           | Land use and land-use changes                        | <b>Before 2000 (TOT=2):</b> Terranova 1989; Segui 1999;<br><b>2000-2010 (TOT=7):</b> Kizos and Koulouri 2005; Cots-Folch et al 2006; Kizos and Koulouri 2006; Di Fazio and Modica 2008; Kizos and Koulouri 2010; Kizos et al. 2010a; Martínez-Casasnovas et al 2010a;<br><b>2011-2020 (TOT=13):</b> Agnoletti et al. 2011; Conti et al. 2011; Momirski and Gabrovec 2014; Savo et al. 2014; Van der Sluis et al. 2014 (Italy); Momirski and Kladnik 2015; Kladnik et al. 2016; Kiesow and Bork 2017; Pipan and Kokalj 2017; Brunori et al. 2018; De Pasquale 2018; Romero Martín et al. 2019; Torquati et al. 2019                                                                                                                                                                                                                                                                                                                                                                                                                                                                                                                                                                                                                                                                                                                                                                                                                                                                                                                                               |
| <b>Descriptive papers</b> | Analysis of landscape features                       | <b>Before 2000 (TOT=13):</b> Strahorn 1929; Hayes 1956; Stanislawski 1962; Ron 1966; De Geus 1975; Galt 1979; Bencherifa 1983; Terranova 1989; Moody and Groove 1990; Grimalt et al. 1992; Slapšak et al. 1998; Sayej 1999; Segui 1999;<br><b>2000-2010 (TOT=30):</b> Barrow and Hicham 2000; Di Pietro 2001; Bevan et al. 2003; Bevan and Conolly 2004; Contessa 2004; Di Fazio et al. 2005; Cyffka 2006; Kizos and Koulouri 2006; Brandolini et al 2007; Rolè 2007; Acovitsiōti-Hameau 2008; Apuani et al. 2008a; Momirski 2008; Benetti et al. 2008; Brancucci and Comenale Pinto 2008; Castex et al. 2008b; Chemin and Varotto 2008; DI Fazio 2008; Di Fazio and Modica 2008; Freppaz et al. 2008a; Freppaz et al. 2008b; Lasen and Fagarazzi 2008; Scaramellini 2008; Momirski and Kladnik 2009; Sayadi 2009; Barbera et al. 2010; Brandolini 2010; Kizos and Koulouri 2010; Kizos et al. 2010a; Pereira Dra et al. 2010;<br><b>2011-2020 (TOT=28):</b> Cicia et al. 2011; Gimenez-Font 2011; Gismondi 2011; Tzanopoulos and Vogiatzakis 2011; Kullaj et al. 2012; Bevan et al. 2013; Montanari 2013; Otero et al. 2013; Van der Sluis et al. 2014; Agnoletti et al. 2015b; Ghadban 2015; Gibson 2015; Mauro 2015; Momirski and Kladnik 2015; Aničić et al. 2016; Kladnik et al. 2016; Paliaga et al. 2016; Romero-Martin et al. 2016; Wilson et al. 2016; Andlar et al. 2017; Lasanta et al. 2017; Šmid Hribar et al. 2017; Andlar and Aničić, 2018; Andlar et al. 2018; Brunori et al. 2018; De Pasquale 2018; Curovic et al. 2019; Torquati et al. 2019; |
|                           | Construction techniques (including ancient terraces) | <b>Before 2000 (TOT=11):</b> Stanislawski 1962; Ron 1966; De Geus 1975; Gilbertson and Chisholm 1976; Edelstein and Kislev 1981; Stager 1982; Gibson and Edelstein 1985; Ron 1985; Terranova 1989; Moody and Groove 1990; Segui 1999;<br><b>2000-2010 (TOT=13):</b> Contessa 2004; Ackermann et al. 2005; Di Fazio et al. 2005; Price and Nixon 2005; Bruins 2007; Rolè 2007; Benetti et al. 2008; Benetti and Patassini 2008; Bonardi 2008; Di                                                                                                                                                                                                                                                                                                                                                                                                                                                                                                                                                                                                                                                                                                                                                                                                                                                                                                                                                                                                                                                                                                                  |

|                                                                                                                                  |  | <p>Fazio 2008; Di Fazio and Modica 2008; Momirski et al. 2008; Barbera et al. 2010;</p> <p><b>2011-2020 (TOT=24):</b> Countryman et al. 2011; Tsermegas et al. 2011; Ashkenazi et al. 2012; Countryman 2012; Di Fazio and Modica 2012; Fall et al. 2012; Kvapil 2012; Ore and Bruins 2012; Davidovich et al. 2012; Al-Houdalieh et al. 2013; Avni et al. 2013; Bevan et al. 2013; Puy and Balbo 2013; Sitjes 2014; Van der Sluis et al. 2014; Agnoletti et al. 2015c; Agnoletti et al. 2015d; Gibson 2015; Ghadban 2015; Rendu et al. 2015; Inbar and Zgaier 2016; Gibson and Lewis 2017; Kiesow and Bork 2017; Pipan and Kokalj 2017</p>                                                                                                                                                                                                                                                                                                          |
|----------------------------------------------------------------------------------------------------------------------------------|--|----------------------------------------------------------------------------------------------------------------------------------------------------------------------------------------------------------------------------------------------------------------------------------------------------------------------------------------------------------------------------------------------------------------------------------------------------------------------------------------------------------------------------------------------------------------------------------------------------------------------------------------------------------------------------------------------------------------------------------------------------------------------------------------------------------------------------------------------------------------------------------------------------------------------------------------------------|
| Other features of the paper                                                                                                      |  | References                                                                                                                                                                                                                                                                                                                                                                                                                                                                                                                                                                                                                                                                                                                                                                                                                                                                                                                                         |
| <p><b>The study analyzes how or why it is important to maintain the system (conservation, regulations, economic reasons)</b></p> |  | <p><b>Before 2000:</b> NA</p> <p><b>2000-2010 (TOT=19):</b> Barrow and Hicham 2000; Khalil 2004; Rolè and Attard 2004; Di Fazio et al. 2005; Rolè et al. 2005; Cots-Folch et al. 2006; Hammad and Børresen 2006; Martínez-Casasnovas and Ramos 2006; Petropoulou 2006; Calatrava Leyva et al. 2007; Masri and Zobisch 2007; Petropoulou 2007; Benetti and Patassini 2008; Brancucci 2008b; Di Fazio 2008; Di Fazio and Modica 2008; Giourga et al. 2008; Kizos et al. 2010a; Kizos et al. 2010b;</p> <p><b>2011-2020 (TOT=15):</b> Gimenez-Font 2011; Di Fazio and Modica 2012; Lasanta et al. 2013; Otero et al. 2013; Stempfle 2015; Asins-Velis et al. 2016; Momirski and Berčič 2016; Romero-Martin et al. 2016; Garini et al. 2017; Kladnik et al. 2017; Zoumides et al. 2017a; Zoumides et al. 2017b; Perlotto and D'Agostino 2018; Terkenli et al. 2018; Ziyadi et al. 2019</p>                                                             |
| <p><b>The study involves the participation of farmers (interviews)</b></p>                                                       |  | <p><b>Before 2000 (TOT=3):</b> Hayes 1956; Estabrook 1998; Segui 1999;</p> <p><b>2000-2010 (TOT=18):</b> Barrow and Hicham 2000; Bonet 2004; Contessa 2004; Di Fazio et al. 2005; Nicolosi et al. 2005; Hammad and Børresen 2006; Kizos and Koulouri 2006; Petropoulou 2006; Calatrava Leyva et al. 2007; Masri and Zobisch 2007; Petropoulou 2007; Estabrook 2007; Giourga et al. 2008; Sayadi 2009; Kizos et al. 2010a; Kizos et al. 2010b; Pereira Dra et al. 2010; Bevan and Conolly 2011;</p> <p><b>2011-2020 (TOT=19):</b> Cicia et al. 2011; Tsermegas et al. 2011; Al-Houdalieh et al. 2013; Bevan et al. 2013; Montanari 2013; Otero et al. 2013; Savo et al. 2014; Paliaga et al. 2016; Wilson et al. 2016; Garini et al. 2017; Zoumides et al. 2017a; Zoumides et al. 2017b; Kiesow and Bork 2017; Pipan and Kokalj 2017; Šmid Hribar et al. 2017; De Pasquale 2018; Terkenli et al. 2018; Torquati et al. 2019; Ziyadi et al. 2019</p> |
| <p><b>The study examines the distribution of terraces at a site/ regional level</b></p>                                          |  | <p><b>Before 2000 (TOT=6):</b> Hayes 1956; Gilbertson and Chisholm 1976; Terranova 1989; Moody and Groove 1990; Grimalt et al. 1992; Segui 1999;</p> <p><b>2000-2010 (TOT=5):</b> Di Fazio and Modica 2008; Ninfo 2008; Varotto and Ferrarese 2008; Barbera et al. 2010; Kizos et al. 2010a;</p> <p><b>2011-2020 (TOT=31):</b> Conti et al. 2011; Countryman et al. 2011; Mauro 2011; Bailly and Levavasseur 2012; Barbera and Cullotta 2012; Countryman 2012; Haiman 2012; Kvapil 2012; Bevan et al.</p>                                                                                                                                                                                                                                                                                                                                                                                                                                          |

|                                                                                                                                                                                       |                                                                                                                                                                                                                                                                                                                                                                                                                                                                                                                                                                                                                                                                                      |
|---------------------------------------------------------------------------------------------------------------------------------------------------------------------------------------|--------------------------------------------------------------------------------------------------------------------------------------------------------------------------------------------------------------------------------------------------------------------------------------------------------------------------------------------------------------------------------------------------------------------------------------------------------------------------------------------------------------------------------------------------------------------------------------------------------------------------------------------------------------------------------------|
|                                                                                                                                                                                       | <p>2013; Galletti et al. 2013; Preti et al. 2013; Satıcı 2013; Diaz-Varela et al. 2014; Savo et al. 2014; Sofia et al. 2014; Agnoletti et al. 2015a; Agnoletti et al. 2015c; Kokalj 2015; Rendu et al. 2015; Momirski and Berčič 2016; Berčič 2016; Kladnik et al. 2016; Gibson and Lewis 2017; Lasanta et al. 2017; Momirski 2017; Pipan and Kokalj 2017; Šmid Hribar et al. 2017; Capolupo et al. 2018b; Ferrarese et al. 2018; Romero Martín et al. 2019; Torquati et al. 2019</p>                                                                                                                                                                                                |
| <b>The study analyzes the effect of terraces on crop productivity</b>                                                                                                                 | <p><b>Before 2000:</b> NA</p> <p><b>2000-2010 (TOT=5):</b> Pla and Nacci 2003; Garlato and Dalla Rosa 2008; Martínez-Casasnovas et al. 2010b; Van Asperen et al. 2014; Stavi et al. 2017</p> <p><b>2011-2020:</b> NA</p>                                                                                                                                                                                                                                                                                                                                                                                                                                                             |
| <b>The study compares some features (soil erosion rates in different conditions, vegetation, cultivation potential, terrace stability, land-use changes, construction techniques)</b> | <p><b>Before 2000:</b> NA</p> <p><b>2000-2010 (TOT=10):</b> Oliveira et al. 2001; Pla and Nacci 2003; Talhouk et al. 2005; Ramos et al. 2007; Al Ali et al. 2008; Freppaz et al. 2008c; Lesschen 2008; Lesschen et al. 2008; Zgaier 2008; Solé-Benet et al. 2010;</p> <p><b>2011-2020 (TOT=17):</b> Agnoletti et al. 2011; Duran Zuazo et al. 2011; Tsermegas et al. 2011; Tarolli et al. 2014; Ramos et al. 2015; Tarolli et al. 2015; Arévalo et al. 2016; Cerdà et al. 2016; Kladnik et al. 2016; Ramos 2016; Arévalo et al. 2017; Martínez-Hernández et al. 2017; Stavi et al. 2017; Rodrigo-Comino et al. 2018; Stavi et al. 2018; Ackermann et al. 2019; Stavi et al. 2019</p> |

**Table S4. Maintenance strategies for terrace structures**

| <b>Maintenance Strategy and type of terrace (and number of case studies)</b>                                       | <b>Country (and Reference)</b>                                                                                                                                                                                                                                                                                                                                                                                                                                                                                                                                                                                                                                  |
|--------------------------------------------------------------------------------------------------------------------|-----------------------------------------------------------------------------------------------------------------------------------------------------------------------------------------------------------------------------------------------------------------------------------------------------------------------------------------------------------------------------------------------------------------------------------------------------------------------------------------------------------------------------------------------------------------------------------------------------------------------------------------------------------------|
| <i>Dry stone terraces</i>                                                                                          |                                                                                                                                                                                                                                                                                                                                                                                                                                                                                                                                                                                                                                                                 |
| <b>Maintain natural vegetation in irrigation ditches (1)</b>                                                       | <b>Portugal</b> (Estabrook 2007)                                                                                                                                                                                                                                                                                                                                                                                                                                                                                                                                                                                                                                |
| <b>Manage the drainage/waterway system</b> (building /clearing, maintenance of natural drainage lines) <b>(19)</b> | <p><b>Spain</b> (Gallart et al. 1994; Ramos and Porta 1997; Otero et al. 2013)</p> <p><b>France</b> (Castex et al. 2008b)</p> <p><b>Italy</b> (Terranova 1989; Contessa 2004-Campania, Tuscany; Benetti et al. 2008; Bonardi 2008; Di Fazio 2008; Di Fazio and Modica 2008; Barbera et al. 2010; Tarolli et al. 2014 -Campania; Agnoletti et al. 2019)</p> <p><b>Israel</b> (Ron 1966; Ron 1985; Inbar and Zgaier 2016; Stavi et al. 2017)</p> <p><b>Syria</b> (Masri and Zobisch 2007)</p>                                                                                                                                                                     |
| <b>Build the terraces with traditional and meticulous construction techniques (3)</b>                              | <p><b>Portugal</b> (Kiesow and Bork 2017)</p> <p><b>Italy</b> (Tarolli et al. 2014 -Campania)</p> <p><b>Greece</b> (Kizos and Koulouri 2006)</p>                                                                                                                                                                                                                                                                                                                                                                                                                                                                                                                |
| <b>Reparation/reconstruction of the walls (21)</b>                                                                 | <p><b>Portugal</b> (Kiesow and Bork 2017)</p> <p><b>Spain</b> (Segui 1999; Lasanta et al. 2001; Sanchez-Maranon et al. 2002; Calsamiglia et al. 2017; Romero Martín et al. 2019)</p> <p><b>France</b> (Castex et al. 2008b)</p> <p><b>Italy</b> (Contessa 2004 – Liguria; Benetti et al. 2008; Brancucci 2008a; Di Fazio 2008; Garini et al. 2017; Torquati et al. 2019)</p> <p><b>Malta</b> (Rolè 2007)</p> <p><b>Greece</b> (Kizos and Koulouri 2006; Papanastasis 2007; Tsermegas et al. 2011; Bevan et al. 2013; Terkenli et al. 2018)</p> <p><b>Israel</b> (Ron 1966)</p> <p><b>Syria</b> (Masri and Zobisch 2007)</p>                                     |
| <b>Unspecified “maintenance” of the terraces or the terrace walls (57)</b>                                         | <p><b>Portugal</b> (Nunes et al. 2018)</p> <p><b>Spain</b> (Faulkner et al. 2003; Calatrava Leyva et al. 2007; Calsamiglia et al. 2017)</p> <p><b>Italy</b> (Di Fazio et al. 2005; Nicolosi et al. 2005; Brandolini et al. 2007; Apuani et al. 2008b; Benetti and Patassini 2008; Bonardi 2008; Di Fazio 2008; Di Fazio and Modica 2008; Barbera et al. 2010; Di Fazio and Modica 2012; Preti et al. 2013; Camera et al. 2014; Tarolli et al. 2014 -Liguria, Tuscany; Camera et al. 2015; Mauro 2015; Stempfle 2015; Paliaga et al. 2016; Garini et al. 2017; Scopesi et al. 2017; Brandolini et al. 2018; Capolupo et al. 2018a; Capolupo et al. 2018b; De</p> |



|                                                                                                            |                                                                                                                                                                                                                                                                                                                                                                                                                                                                                                                                                                                                                                                                                                                                                                                                                                         |
|------------------------------------------------------------------------------------------------------------|-----------------------------------------------------------------------------------------------------------------------------------------------------------------------------------------------------------------------------------------------------------------------------------------------------------------------------------------------------------------------------------------------------------------------------------------------------------------------------------------------------------------------------------------------------------------------------------------------------------------------------------------------------------------------------------------------------------------------------------------------------------------------------------------------------------------------------------------|
|                                                                                                            | <p>Pasquale 2018; Preti et al. 2018a; Preti et al. 2018b; Terkenli et al. 2018; Agnoletti et al. 2019; Torquati et al. 2019)</p> <p><b>Greece</b> (Siebert 2004; Kizos and Koulouri 2005; Krahtopoulou and Frederick 2008; Kizos and Koulouri 2010; Kizos et al. 2010a; Kizos et al. 2010b; Palmer et al. 2010; Bevan and Conolly 2011; Van der Sluis et al. 2014)</p> <p><b>Malta</b> (Rolè et al. 2005; Cyffka 2006; Cyffka and Bock 2008; Rolè and Attard 2008)</p> <p><b>Cyprus</b> (Djuma et al. 2017)</p> <p><b>Israel</b> (Zgaier and Inbar 2005; Inbar and Zgaier 2016; Stavi et al. 2018; Ackermann et al. 2019; Stavi et al. 2019)</p> <p><b>Palestine</b> (Hammad et al. 2004; Hammad and Børresen 2006)</p> <p><b>Syria</b> (Masri and Zobisch 2007)</p> <p><b>Morocco</b> (Barrow and Hicham 2000; Ziyadi et al. 2019)</p> |
| <b>Remove vegetation</b> from the walls/shrubs from the fields (9)                                         | <p><b>Italy</b> (Contessa 2004 -Campania; Rühl et al. 2006; Benetti et al. 2008)</p> <p><b>France</b> (Castex et al. 2008b)</p> <p><b>Greece</b> (Kizos and Koulouri 2010; Kizos et al. 2010a; Kizos et al. 2010b; Palmer et al. 2010)</p>                                                                                                                                                                                                                                                                                                                                                                                                                                                                                                                                                                                              |
| <b>Monitoring by farmers</b> (1)                                                                           | Agnoletti et al. 2019                                                                                                                                                                                                                                                                                                                                                                                                                                                                                                                                                                                                                                                                                                                                                                                                                   |
|                                                                                                            |                                                                                                                                                                                                                                                                                                                                                                                                                                                                                                                                                                                                                                                                                                                                                                                                                                         |
| <i>Earth embankments</i>                                                                                   |                                                                                                                                                                                                                                                                                                                                                                                                                                                                                                                                                                                                                                                                                                                                                                                                                                         |
| <b>Unspecified “maintenance”</b> of the terraces or the terrace walls (10)                                 | <p><b>Spain</b> (Martínez-Casasnovas and Ramos 2006; Lesschen 2008; Lesschen et al. 2008; Bellin et al. 2009; Lesschen et al. 2009; Meerkerk et al. 2009)</p> <p><b>Slovenia</b> (Momirski and Kladnik 2009; Pipan and Kokalj 2017)</p> <p><b>Greece</b> (Petropoulou 2006; Petropoulou 2007)</p>                                                                                                                                                                                                                                                                                                                                                                                                                                                                                                                                       |
| <b>No-tillage</b> (1)                                                                                      | <b>Spain</b> (Duran Zuazo et al. 2005)                                                                                                                                                                                                                                                                                                                                                                                                                                                                                                                                                                                                                                                                                                                                                                                                  |
| <b>Maintain a vegetation cover on the embankments</b> (3)                                                  | <p><b>Slovenia</b> (Momirski et al. 2008)</p> <p><b>Greece</b> (Petropoulou 2006; Petropoulou 2007)</p>                                                                                                                                                                                                                                                                                                                                                                                                                                                                                                                                                                                                                                                                                                                                 |
| <b>Irrigate with a drip system</b> (1)                                                                     | <b>Spain</b> (Duran Zuazo et al. 2005)                                                                                                                                                                                                                                                                                                                                                                                                                                                                                                                                                                                                                                                                                                                                                                                                  |
| <b>Refill rills and gullies</b> (1)                                                                        | <b>Spain</b> (Martínez-Casasnovas and Ramos 2006)                                                                                                                                                                                                                                                                                                                                                                                                                                                                                                                                                                                                                                                                                                                                                                                       |
| <b>Manage the drainage/waterway system</b> (building /clearing, maintenance of natural drainage lines) (1) | <b>Spain</b> (Martínez-Casasnovas and Ramos 2006)                                                                                                                                                                                                                                                                                                                                                                                                                                                                                                                                                                                                                                                                                                                                                                                       |
|                                                                                                            |                                                                                                                                                                                                                                                                                                                                                                                                                                                                                                                                                                                                                                                                                                                                                                                                                                         |
| <i>Mixed</i>                                                                                               |                                                                                                                                                                                                                                                                                                                                                                                                                                                                                                                                                                                                                                                                                                                                                                                                                                         |

|                                                                                                            |                                                                                                                                                                           |
|------------------------------------------------------------------------------------------------------------|---------------------------------------------------------------------------------------------------------------------------------------------------------------------------|
| <b>Unspecified “maintenance”</b> of the terraces or the terrace walls (5)                                  | <b>Spain</b> (Lasanta et al. 2017)<br><b>Italy</b> (Agnoletti et al. 2011; Van der Sluis et al. 2014)<br><b>Slovenia</b> (Momirski and Kladnik 2015; Kladnik et al. 2016) |
| <b>Refill rills and gullies</b> (with stones or soil) (1)                                                  | <b>Spain</b> (Pla and Nacci 2003)                                                                                                                                         |
| <b>Clear the walls from vegetation</b> (dry stones) (2)                                                    | <b>Slovenia</b> (Momirski and Gabrovec 2014)<br><b>Italy</b> (Savo et al. 2014)                                                                                           |
| <b>Maintain a vegetation cover</b> (earth embankments) (1)                                                 | <b>Italy</b> (Savo et al. 2014)                                                                                                                                           |
| <b>Reparation/reconstruction of the walls</b> (2)                                                          | <b>Slovenia</b> (Momirski and Gabrovec 2014)<br><b>Italy</b> (Savo et al. 2014)                                                                                           |
| <b>Manage the drainage/waterway system</b> (building /clearing, maintenance of natural drainage lines) (3) | <b>Italy</b> (Savo et al. 2014; Tarolli et al. 2015)<br><b>Tunisia</b> (Missaoui 1996)                                                                                    |
| <b>Maintain a dry rock belt</b> (1)                                                                        | <b>Tunisia</b> (Missaoui 1996)                                                                                                                                            |
|                                                                                                            |                                                                                                                                                                           |
| NA                                                                                                         |                                                                                                                                                                           |
| <b>Unspecified “maintenance”</b> of the terraces or the terrace walls (3)                                  | <b>Spain</b> (Arévalo et al. 2017)<br><b>Italy</b> (Wilson et al. 2016)<br><b>Greece</b> (Giourga et al. 2008)                                                            |
| <b>Manage the drainage/waterway system</b> (building /clearing, maintenance of natural drainage lines) (2) | <b>Spain</b> (Sayadi 2009; Arévalo et al. 2016)                                                                                                                           |
| <b>Reparation/reconstruction of the walls</b> (1)                                                          | <b>Italy</b> (Wilson et al. 2016)                                                                                                                                         |

## References

1. Ackermann, O., Bruins, H. J., Sarah, P., Zhevelev, H. & Maeir, A. M. Landscape archaeology in a dry-stream valley near Tell es-Safi/Gath (Israel): agricultural terraces and the origin of fill deposits. *Environ. Archaeol.* **10**(2), 199-215 (2005).
2. Ackermann, O., Svoray, T. & Haiman, M. Nari (calcrete) outcrop contribution to ancient agricultural terraces in the Southern Shephelah, Israel: insights from digital terrain analysis and a geoarchaeological field survey. *J. Archaeol. Sci.* **35**(4), 930-941 (2008).
3. Ackermann, O., Zhevelev, H. M. & Svoray, T. Agricultural systems and terrace pattern distribution and preservation along climatic gradient: From sub-humid mediterranean to arid conditions. *Quatern. Int.* **502**, 319-326 (2019).
4. Acovitsióti-Hameau, A. in *Terraced landscapes of the Alps* (eds Scaramellini, G. & Varotto M.) 19-27 (Marsilio, 2008).
5. Agnoletti, M. *et al.* Traditional landscape and rural development: Comparative study in three terraced areas in northern, central and southern Italy to evaluate the efficacy of GAEC standards 4.4 of cross compliance. *Ital. J. Agron.* **6**, 121–139 (2011).
6. Agnoletti, M., Conti, L., Frezza, L., Monti, M. & Santoro, A. Features analysis of dry stone walls of Tuscany (Italy). *Sustainability* **7**(10), 13887-13903 (2015c).
7. Agnoletti, M., Conti, L., Frezza, L. & Santoro, A. Territorial analysis of the agricultural terraced landscapes of Tuscany (Italy): preliminary results. *Sustainability* **7**(4), 4564-4581 (2015a).

8. Agnoletti, M., Conti, L., Frezza, L. & Santoro, A. How to analyse the typological features of stone terrace walls. A methodology applied to the rural landscape of the Tuscan Region (Central Italy). *Geophysical Research Abstracts* **17**, 10473 (2015d).
9. Agnoletti, M., Errico, A., Santoro, A., Dani, A. & Preti, F. Terraced Landscapes and Hydrogeological Risk. Effects of Land Abandonment in Cinque Terre (Italy) during Severe Rainfall Events. *Sustainability* **11**(1), 235 (2019).
10. Agnoletti, M., Tredici, M., Santoro, A. Biocultural diversity and landscape patterns in three historical rural areas of Morocco, Cuba and Italy. *Biodivers. Conserv.* **24**, 3387-3404 (2015b).
11. Aharoni, Y., Evenari, M., Shanan, L. & Tadmor, N.H. The Ancient Desert Agriculture of the Negev: V. An Israelite Agricultural Settlement at Ramat Matred. *Isr. Explor. J.* **10**(1), 23-36 (1960).
12. Al Ali, Y., Touma, J., Zante, P., Nasri, S. & Albergel, J. Water and sediment balances of a contour bench terracing system in a semi-arid cultivated zone (El Gouazine, central Tunisia). *Hydrolog. Sci. J.* **53**(4), 883-892 (2008).
13. Al-Houdalieh, S. H. & Ghadban, S. S. Agricultural Watchtowers in Al-Tireh Quarter and 'Ain Qinia Village, Ramallah, Palestine. *Int. J. Archit. Herit.* **7**(5), 509- 535 (2013).
14. Aničić, B., Rechner, I. & Perica, D. Structural vocabulary of cultural landscape on the island of Krk. *Acta Carsologica* **33**(1), 102-116 (2016).
15. Andlar, G. & Aničić, B. in *Routledge handbook of landscape character assessment: current approaches to characterisation and assessment* (eds Fairclough, G., Herlin, I. S. & Swanwick, C.) 108-123 (Routledge, 2018).
16. Andlar, G., Šrajter, F. & Trojanović, A. Classifying the Mediterranean terraced landscape: The case of Adriatic Croatia. *Acta Geogr. Slov.* **57**(2), 111-129 (2017).
17. Andlar, G., Šrajter, F. & Trojanović, A. Discovering cultural landscape in Croatia: History and classification of Croatian Adriatic enclosed landscape. *Annales-Anali za Istrske in Mediteranske Studije-Series Historia et Sociologia* **28**(4), 759-778 (2018).
18. Apuani T. *et al.* in *Terraced landscapes of the Alps* (eds Scaramellini, G. & Varotto M.) 88-92 (
19. Apuani, T., Masetti, M. & Conforto, A. in: *Terraced Landscapes of the Alps. Projects in Progress* (eds Fontanari, E. & Patassini, D.) 20-22 (Marsilio, 2008b).
20. Arbelo, C. D. *et al.* Soil degradation processes and plant colonization in abandoned terrace fields overlying pumice tuffs. *Land Degrad. Dev.* **17**, 571-588 (2006).
21. Arévalo, J. R. *et al.* Relationships between soil parameters and vegetation in abandoned terrace fields vs. non-terraced fields in arid lands (Lanzarote, Spain): An opportunity for restoration. *Acta Oecol.* **85**, 77-84 (2017).
22. Arévalo, J. R., Tejedor, M., Jiménez, C., Reyes-Betancort, J. A. & Díaz, F. J. Plant species composition and richness in abandoned agricultural terraces vs. natural soils on Lanzarote (Canary Islands). *J. Arid Environ.* **124**, 165-171 (2016).
23. Arnáez, J., Lasanta, T., Ruiz-Flano, P. & Ortigosa, L. Factors affecting runoff and erosion under simulated rainfall in Mediterranean vineyards. *Soil Till. Res.* **93**, 324-334 (2007).
24. ARPAV. *I suoli dei versanti terrazzati di Valstagna (Mori-Mattietti, Valverta e Col Ventidueore)*. (ARPAV, 2006).
25. Ashkenazi, E., Avni, Y. & Avni, G. A comprehensive characterization of ancient desert agricultural systems in the Negev Highlands of Israel. *J. Arid Environ.* **86**, 55-64 (2012).
26. Ashkenazi, E., Chen, Y., Avni, Y. & Lavee, S. Fruit trees' survival ability in an arid desert environment without irrigation in the Negev Highlands of Southern Israel. *Isr. J. Plant Sci.* **62**(1-2), 5-16 (2015).
27. Asins-Velis, S., Arnau-Rosalen, E., Romero-Gonzalez, J. & Calvo-Cases, A. Analysis of the consequences of the european union criteria on slope gradient for the delimitation of "areas facing natural constraints" with agricultural terraces. *Annales-Anali Za Istrske In Mediteranske Studije-Series Historia Et Sociologia* **26**(3), 433-448 (2016).
28. Avni, G., Porat, N. & Avni, Y. Byzantine–Early Islamic agricultural systems in the Negev Highlands: Stages of development as interpreted through OSL dating. *J. Field Archaeol.* **38**(4), 332-346 (2013).
29. Bailly, J. S. & Levavasseur, F. in *Proceedings of the 2012 IEEE International Geoscience and Remote Sensing Symposium (IGARSS)* (ed, IEEE) 7110–7113 (IEEE, 2012).
30. Barbera, G., Cullotta, S., Rossi-Doria, I., Rühl, J. & Rossi-Doria, B. *I Paesaggi a Terrazze in Sicilia: Metodologie per L'analisi, la Tutela e la Valorizzazione* (ARPA Sicilia, 2010).
31. Barbera, G. & Cullotta, S. An inventory approach to the assessment of main traditional landscapes in Sicily (Central Mediterranean Basin). *Landsc. Res.* **37**, 539–569 (2012).
32. Barrow, C. J. & Hicham, H. Two complimentary and integrated land uses of the western High Atlas Mountains, Morocco: the potential for sustainable rural livelihoods. *Appl. Geogr.* **20**(4), 369-394 (2000).
33. Bellin, N., van Wesemael, B., Meerkerk, A. & Barbera, G. G. Abandonment of soil and water conservation structures in Mediterranean ecosystems. A case study in south east Spain. *Catena* **76**, 114-121 (2009).
34. Bencherifa, A. Land use and equilibrium of mountain ecosystems in the High Atlas of western Morocco. *Mt Res. Dev.* **3**, 273-279 (1983).

35. Benetti, G., Chemin, A., Fontanari, E. & Patassini, D. in: *Terraced Landscapes of the Alps. Projects in Progress* (eds Fontanari, E. & Patassini, D.) 77-99 (Marsilio, 2008).
36. Benetti, G. & Patassini, D. in: *Terraced Landscapes of the Alps. Projects in Progress* (eds Fontanari, E. & Patassini, D.) 104-108 (Marsilio, 2008).
37. Berčič, T. Discovering terraced areas in Slovenia: reliable detection with Lidar. *Annales, Series Historia et Sociologia* **26(3)**, 449-468 (2016).
38. Bevan, A. & Conolly, J. GIS, archaeological survey, and landscape archaeology on the island of Kythera, Greece. *J. Field Archaeol.* **29(1-2)**, 123-138 (2004).
39. Bevan, A. & Conolly, J. Terraced fields and Mediterranean landscape structure: an analytical case study from Antikythera, Greece. *Ecol. Model.* **222(7)**, 1303-1314 (2011).
40. Bevan, A. *et al.* The long-term ecology of agricultural terraces and enclosed fields from Antikythera, Greece. *Human Ecol.* **41(2)**, 255-272 (2013).
41. Bevan, A., Frederick, C. & Krahtopoulou, A. A digital Mediterranean countryside: GIS approaches to the spatial structure of the post-medieval landscape on Kythera (Greece). *Archeologia e Calcolatori* **14**, 217-236 (2003).
42. Bini, C., Ferrarini, A., Spiandorello, M., Wahsha, M. & Zilioli, D. M. Landscape evolution and global soil change in alpine valleys: Impact of anthropodogenesis on terraced soils (Belluno, Northern Italy). *EQA-Int. J. Environ. Quality* **25**, 1-17 (2017).
43. Blasi, C., Di Pietro, R. & Fortini, P. A phytosociological analysis of abandoned terraced olive grove shrublands in the Tyrrhenian district of Central Italy. *Plant Biosyst.* **134(3)**, 305-331 (2000).
44. Boix, C. *et al.* in *International Symposium and Workshop on Desertification in Developed Countries: Why can't We Control It?* (eds Mouat D. A. & Hutchinson C. F.) 79-92 (Springer, 1995).
45. Bonardi L. in *Terraced landscapes of the Alps* (eds Scaramellini, G. & Varotto M.) 28-37 (Marsilio, 2008).
46. Bonet, A. Secondary succession of semi-arid Mediterranean old-fields in south-eastern Spain: insights for conservation and restoration of degraded lands. *J. Arid Environ.* **56(2)**, 213-233 (2004).
47. Brancucci, G. in: *Terraced Landscapes of the Alps. Projects in Progress* (eds Fontanari, E. & Patassini, D.) 18-19 (Marsilio, 2008a).
48. Brancucci, G. in: *Terraced Landscapes of the Alps. Projects in Progress* (eds Fontanari, E. & Patassini, D.) 115-116 (Marsilio, 2008b).
49. Brancucci, G. & Comenale Pinto, A. in *Terraced landscapes of the Alps* (eds Scaramellini, G. & Varotto M.) 80-83 (Marsilio, 2008).
50. Brancucci, G. & Masetti, M. in *Terraced landscapes of the Alps* (eds Scaramellini, G. & Varotto M.) 46-54 (Marsilio, 2008).
51. Brancucci, G. & Paliaga, G. in *Geohazards. ECI Symposium Series* (eds. Nadim, N., Pöttler, R., Einstein, H. Klapperich, H. & Kramer, S.) 10 (Bepress, 2006).
52. Brandolini, P. I versanti costruiti delle Cinque Terre un patrimonio ambientale e paesaggistico a rischio. *Sopra il livello del Mare* **36**, 54-56 (2010).
53. Brandolini, P., Canepa, G., Faccini, F., Robbiano, A. & Terranova, R. Geomorphological and Geo-Environmental features of the Graveglia Valley (Ligurian Apennines, Italy). *Geografia Fisica e Dinamica Quaternaria* **30**, 99-116 (2007).
54. Brandolini, P. *et al.* Response of terraced slopes to a very intense rainfall event and relationships with land abandonment: A case study from Cinque Terre (Italy). *Land Degrad. Dev.* **29**, 630-642 (2018).
55. Bruins, H. J. in *On the Fringe of society: archaeological and ethnoarchaeological perspectives on pastoral and agricultural societies* (eds. van der Steen, E. J. & Saidel, B. A.) 37-43 (Archaeopress, 2007).
56. Bruins, H. J. Ancient desert agriculture in the Negev and climate-zone boundary changes during average, wet and drought years. *J. Arid Environ.* **86**, 28-42 (2012).
57. Bruins, H. J. & Jongmans, A. G. in *Proceedings of the 14th International Working Meeting on Soil Micromorphology* (eds. Poch, R. M., Casamitjana, M. & Francis, M. L.) 292-295 (IUSS, 2012).
58. Brunori, E., Salvati, L., Antogiovanni, A. & Biasi, R. Worrying about 'Vertical Landscapes': Terraced Olive Groves and Ecosystem Services in Marginal Land in Central Italy. *Sustainability* **10(4)**, 1164 (2018).
59. Calatrava Leyva, J., Franco Martínez, J. A. & González Roa, M. D. C. Analysis of the adoption of soil conservation practices in olive groves: the case of mountainous areas in southern Spain (2007).
60. Calsamiglia, A. *et al.* Spatial patterns of sediment connectivity in terraced lands: Anthropogenic controls of catchment sensitivity. *Land Degrad. Dev.* **29**, 1198-1210 (2017).
61. Camera, C. A. S., Apuani, T. & Masetti, M. Mechanisms of failure on terraced slopes: The Valtellina case (northern Italy). *Landslides* **11(1)**, 43-54 (2014).

62. Camera, C., Apuani, T. & Masetti, M. Modelling the stability of terraced slopes: an approach from Valtellina (Northern Italy). *Environ. Earth Sci.* **74**, 855–868 (2015).
63. Camera, C. *et al.* Monitoring soil erosion in terraced catchments in Mediterranean regions: a field experiment in Cyprus. *Geophysical Research Abstracts* **18**, 627 (2016).
64. Camera, C. *et al.* Quantifying the effectiveness of mountain terraces on soil erosion protection with sediment traps and dry-stone wall laser scans. *Catena* **171**, 251-264 (2018).
65. Camera, C. *et al.* Quantification of the effect of terrace maintenance on soil erosion: two seasons of monitoring experiments in Cyprus. *Geophysical Research Abstracts* **19**, 7404 (2017).
66. Capolupo, A., Kooistra, L. & Boccia, L. Geomorphological change detection and historical evolution analysis of terraced landscapes, an old irreversible agricultural practice: the case study of Minori, in Campania Region. *Geophysical Research Abstracts* **20**, 18700 (2018a).
67. Capolupo, A., Kooistra, L. & Boccia, L. A novel approach for detecting agricultural terraced landscapes from historical and contemporaneous photogrammetric aerial photos. *Int. J. Appl. Earth Obs. Geoinf.* **73**, 800-810 (2018b).
68. Castex, J.-M., Dagne, A. & Gorda, F. in: *Terraced Landscapes of the Alps. Projects in Progress* (eds Fontanari, E. & Patassini, D.) 55-56 (Marsilio, 2008a).
69. Castex J.-M. *et al.* in *Terraced landscapes of the Alps* (eds Scaramellini, G. & Varotto M.) 76-79 (Marsilio, 2008b).
70. Cerdà, A. *et al.* The impact of agriculture terraces on soil organic matter, aggregate stability, water repellency and bulk density. A study in abandoned and active farms in the Sierra de Enguera, Eastern Spain. *Geophys. Res. Abstr.* **25**, 288-296 (2016).
71. Cevasco, A. & Rollando, A. in: *Terraced Landscapes of the Alps. Projects in Progress* (eds Fontanari, E. & Patassini, D.) 57-59 (Marsilio, 2008).
72. Chemin A. & Varotto M. in *Terraced landscapes of the Alps* (eds Scaramellini, G. & Varotto M.) 97-101 (Marsilio, 2008).
73. Cicia, G., Colantuoni, F. & Pascucci, S. Community supported agriculture in the urban fringe: empirical evidence for project feasibility in the metropolitan area of Naples (Italy). *Int. J. Food Syst. Dynamics* **2**(3), 326-339 (2011).
74. Contessa, V. Terraced landscapes in Italy: state of the art and future challenges (MS thesis, Università Degli Studi Di Padova, 2014).
75. Conti, L., Tei, T., Sorbetti Guerri, F. & Barbari, M.. in *Proceedings of the AIIA National Congress Gestione e Controllo dei Sistemi Agrari e Forestali* (ed. AIIA) (2011).
76. Cots-Folch, R., Martinez-Casasnovas, J. A. & Ramos, M. C. Land terracing for new vineyard plantations in the NortheEastern Spanish Mediterranean region: landscape effects of the EU council regulation policy for vineyards' restructuring. *Agric. Ecosyst. Environ.* **115**, 88-96 (2006).
77. Countryman, J. R. *Agricultural terracing and landscape history at Monte Pallano, Abruzzo, Italy* (Doctoral dissertation, Oberlin College) (2012).
78. Countryman, J. R., Carrier, S. C. & Kane, S. E. in *Revive the Past: Proceedings of the 39th Conference in Computer Applications and Quantitative Methods in Archaeology* (ed. Verhagen, P.) 307-317 (Amsterdam University Press, 2011).
79. Crosta, G.B., Dal Negro, P. & Frattini, P. Soil slips and debris flows on terraced slopes. *Nat. Hazard Earth Sys.* **3**, 31–42 (2003).
80. Curović, Ž. *et al.* Identification and evaluation of landscape as a precondition for planning revitalization and development of mediterranean rural settlements—case study: Mrkovi Village, Bay of Kotor, Montenegro. *Sustainability* **11**(7), 2039 (2019).
81. Cyffka, B. in *Environmental Security and Sustainable Land Use-with special reference to Central Asia* (eds. Vogtmann, H. & Dobretsov, N.) 85-103 (Springer, 2006).
82. Cyffka, B. & Bock, M. Degradation of field terraces in the Maltese Islands - reasons, processes and effects. *Dinamica Quaternaria* **31**, 119-128 (2008).
83. Davidovich, U., Porat, N., Gadot, Y., Avni, Y. & Lipschits, O. Archaeological investigations and OSL dating of terraces at Ramat Rahel, Israel. *J. Field Archaeol.* **37**(3), 192-208 (2012).
84. De Geus, C. H. J. The Importance of Archaeological Research into the Palestinian Agricultural Terraces, with an Excursus on the Hebrew Word gbī. *Palest. Explor. Q.* **107**(1), 65-74 (1975).
85. De Pasquale, G. Terraced landscapes in southern Italy: Comparative anayisis between the past, present and future. *Annales-Anali Za Istrske In Mediteranske Studije-Series Historia Et Sociologia* **28**(4), 709-724 (2018).
86. Di Fazio, S. I terrazzamenti viticoli della Costa Viola. Caratteri distintivi del paesaggio, trasformazioni in atto e gestione territoriale in un caso-studio in Calabria. *I Georgofili Quaderni* **II**, 69–92 (2008).

87. Di Fazio, S., Malaspina, D. & Modica, G. La gestione territoriale dei paesaggi agrari terrazzati tra conservazione e sviluppo. Proceedings of the National Congress of AIIA (Italian Society of Agricultural Engineers) Ingegneria agraria per lo sviluppo sostenibile in area mediterranea, Catania, Italy (2005).
88. Di Fazio, S. & Modica, G. *Le pietre sono parole: letture del paesaggio dei terrazzamenti agrari della Costa Viola* (Iiriti Editore, 2008).
89. Di Fazio, S. & Modica, G. in: *Proceedings of the International Conference of Agricultural Engineering* (ed. Juste F.) (CIGR-AgEng, 2012).
90. Di Pietro F. Assessing ecologically sustainable agricultural land-use in the Central Pyrénées at the field and landscape level. *Agric. Ecosyst. Environ.* **86**, 93–103 (2001).
91. Di Pietro, R. & Filibeck, G. Terrazzamenti abbandonati e recupero della vegetazione spontanea: il caso dei Monti Aurunci. *Inf. Bot. It.* **32(1-3)**, 17-30 (2000).
92. Diaz-Varela, R. A., Zarco-Tejada, P. J., Angileri, V. & Loudjani, P. Automatic identification of agricultural terraces through object-oriented analysis of very high resolution DSMs and multispectral imagery obtained from an unmanned aerial vehicle. *J. Environ. Manag.* **134**, 117–126 (2014).
93. Djuma, H., Bruggeman, A., Camera, C., Tlais, S. & Eliades, M. Effects of soil erosion on soil organic carbon on a terraced vineyard in a mountainous Mediterranean environment *Geophysical Research Abstracts* **20**, 953 (2018).
94. Djuma, H., Bruggeman, A., Camera, C. & Zoumides, C. Combining qualitative and quantitative methods for soil erosion assessments: An application in a sloping Mediterranean watershed, Cyprus. *Land Degrad. Dev.* **28(1)**, 243-254 (2017).
95. Djuma, H., Camera, C., Faka, M., Bruggeman, A. & Hermon, S. Assessment of dry-stone terrace wall degradation with a 3D approach. *Geophysical Research Abstracts* **18**, 804-1 (2016).
96. Douglas, T., Critchley, D. & Park, G. The deintensification of terraced agricultural land near Trevelez, Sierra Nevada, Spain. *Glob. Ecol. Biogeogr.* **5**, 258-270 (1996).
97. Douglas, T., Kirkby, S. J., Critchley, R.W. & Park, G. J. Agricultural terrace abandonment in the Alpujarra, Andalucia, Spain. *Land Degrad. Dev.* **5**, 281–291 (1994).
98. Dunjó, G., Pardini, G. & Gispert, M. Land use change effects on abandoned terraced soils in a Mediterranean catchment, NE Spain. *Catena* **52**, 23–37 (2003).
99. Duran Zuazo, V. H., Aguilar Ruiz, J., Martinez Raya, A. & Franco Tarifa, D. Impact of erosion in the taluses of subtropical orchard terraces. *Agric. Ecosyst. Environ.* **107**, 199-210 (2005).
100. Durán Zuazo, V. H., Martínez Raya, A., Aguilar Ruiz, J. Nutrient losses by runoff and sediment from the taluses of orchard terraces. *Water, Air, Soil Pollut.* **153**, 355–373, (2004).
101. Duran Zuazo, V. *et al.* Environmental impact of introducing plant covers in the taluses of terraces: Implications for mitigating agricultural soil erosion and runoff. *Catena*, **84(1-2)**, 79-88 (2011).
102. Edelstein, G. & Kislev, M. Mevasseret Yerushalayim: the ancient settlement and its agricultural terraces. *Biblical Archaeology* **44 (1)**, 53-56 (1981).
103. Emran, M., Gispert, M. & Pardini, G. Patterns of soil organic carbon, glomalin and structural stability in abandoned Mediterranean terraced lands. *Eur. J. Soil Sci.* **63(5)**, 637-649 (2012).
104. Estabrook, G. F. Maintenance of fertility of shale soils in a traditional agricultural system in central interior Portugal. *J. Ethnobiol.* **18**, 15-33 (1998).
105. Estabrook, G. F. Living Grass Irrigation Ditches in Traditional Portuguese Agriculture: Autecology in the study of ethnobotany. *Ethnobot. Res. Appl.* **5**, 319-330 (2007).
106. Fall, P.L. *et al.* Long-term agrarian landscapes in the Troodos foothills, Cyprus. *J. Archaeol. Sci.* **39(7)**, 2335-2347 (2012).
107. Faria, A., Bateira, C., Oliveira, S., Fernandes, J. & Marques, F. Landslide susceptibility evaluation on agricultural terraces by the application of physically based mathematical models= Avaliação de suscetibilidade a movimentos de vertente em terraços agrícolas pela aplicação de modelos matemáticos de base física. *Revista do Departamento de Geografia Universidade de São Paulo* **33**, 1-11 (2017).
108. Faulkner, H., Ruiz, J., Zukowskyj, P. & Downward, S. Erosion risk associated with rapid and extensive agricultural clearances on dispersive materials in southeast Spain. *Environ. Sci. Policy* **6(1)**, 115-127 (2003).
109. Fernandes, J., Bateira, C., Costa, A., Fonseca, B. & Moura, R. Electrical resistivity and spatial variation in agriculture terraces: statistical correlation between ert and flow direction algorithms. *Open Agric.* **2(1)**, 329-340 (2017a).
110. Fernandes, J. *et al.* SIMWE model application on susceptibility analysis to bank gully erosion in Alto Douro Wine Region agricultural terraces. *Catena* **153**, 39-49 (2017b).
111. Ferrarese, F. *et al.* in: *World Terraced Landscapes: History, Environment, Quality of Life. Environmental History* (eds Varotto, M., Bonardi, L. & Tarolli P.) 179-184 (Springer, 2018).



112. Filesì, L. in: *Terraced Landscapes of the Alps. Projects in Progress* (eds Fontanari, E. & Patassini, D.) 51-54 (Marsilio, 2008).
113. Fleskens, L., Stroosnijder, L., Ouessar, M. & De Graaff, J. Evaluation of the on-site impact of water harvesting in southern Tunisia. *J. Arid Environ.* **62**(4), 613-630 (2005).
114. French, C. A. I., Whitelaw, T. M. Soil Erosion, Agricultural Terracing and Site Formation Processes at Markiani, Amorgos, Greece: The Micromorphological Perspective. *Geoarchaeology* **14**(2), 151-189 (1999).
115. Freppaz M. *et al.* in *Terraced landscapes of the Alps* (eds Scaramellini, G. & Varotto M.) 61-67 (Marsilio, 2008a).
116. Freppaz M. *et al.* in *Terraced landscapes of the Alps* (eds Scaramellini, G. & Varotto M.) 84-87 (Marsilio, 2008b).
117. Freppaz, M. *et al.* in: *Terraced Landscapes of the Alps. Projects in Progress* (eds Fontanari, E. & Patassini, D.) 37-39 (Marsilio, 2008c).
118. Gabriels, D., Cornelis, W. M. & Schiettecatte, W. in *Land Use, Land Cover and Soil Sciences-Volume V: Dry Lands and Desertification* (ed. Verheye W. H.) 220-232 (EOLSS Publications, 2009).
119. Gadot, Y. *et al.* The formation of a mediterranean terraced landscape: mount eitan, judean highlands, Israel. *J. Archaeol. Sci.* **6**, 397-417 (2016a).
120. Gadot, Y., Davidovich, U., Avni, Y., Avni, G. & Porat, N. The Formation of Terraced Landscapes in the Judean Highlands in Israel, and its Implications for Biblical Agricultural History. *Hebrew Bible and Ancient Israel* **5**(4), 437-455 (2016b).
121. Gallart, F., Llorens, P. & Latron, J. Studying the role of old agricultural terraces on runoff generation in a Mediterranean small mountainous basin. *J. Hydrol.* **159**, 291-303 (1994).
122. Galletti, C. S., Ridder, E., Falconer, S. E. & Fall, P. L. Maxent modeling of ancient and modern agricultural terraces in the Troodos foothills, Cyprus. *Appl. Geogr.* **39**, 46-56 (2013).
123. Galt, A. H. Exploring the cultural ecology of field fragmentation and scattering on the island of Pantelleria, Italy. *J. Anthropol. Res.* **35**(1), 93-108 (1979).
124. García-Comendador, J., Fortesa, J., Calsamiglia, A., Calvo-Cases, A. & Estrany, J. Post-fire hydrological response and suspended sediment transport of a terraced Mediterranean catchment. *Earth Surf. Proc. Land.* **42**(14), 2254-2265 (2017).
125. Garini, C. S., Vanwindekens, F., Scholberg, J. M. S., Wezel, A. & Groot, J. C. Drivers of adoption of agroecological practices for winegrowers and influence from policies in the province of Trento, Italy. *Land Use Pol.* **68**, 200-211 (2017).
126. Garlato, A. & Dalla Rosa, A. in: *Terraced Landscapes of the Alps. Projects in Progress* (eds Fontanari, E. & Patassini, D.) 47-50 (Marsilio, 2008).
127. Ghadban, S. Palestinian dry stone structures: an endogenous expression of cultural landscape. *Sustainable Development, Culture, Traditions* **1b**, 34-47 (2015).
128. Gibson, S. in *Soils and Sediments as Archives of Environmental Change. Geoarchaeology and Landscape Change in the Subtropics and Tropics* (eds. Lucke, B., Bäumler, R. & Schmidt, M.) 295-314 (Erlanger Geographische Arbeiten Band, 2015).
129. Gibson, S. & Edelstein, G. Investigating Jerusalem's rural landscape. *Levant* **17**(1), 139-156 (1985).
130. Gibson, S., Lewis, R. Y. The Origins of Terracing in the Southern Levant and Patch Cultivation/Box Fields. *Landsc. Ecol.* **10**(3), 256-265 (2017).
131. Gilbertson, D. D. & Chisholm, N. W. T. ULVS XXVIII: Manipulating the Desert Environment: ancient walls, floodwater farming and territoriality in the Tripolitanian pre-desert of Libya. *Libyan Studies* **27**, 17-52 (1976).
132. Gimenez-Font, P. in *Produits agricoles, touristiques et développement local* (eds. Kerzazi, M., Hamza, M.A. & El Assad. Casablanca, M.) 307-317 (ANAGEM, GREMR, 2011).
133. Ginés, Á. Agriculture, grazing and land changes at the Serra de Tramuntana karstic mountains. *Int. J. Speleol.* **28**(1), 1 (1999).
134. Giourga, C., Loumou, A., Tsevreñi, I. & Vergou, A. Assessing the sustainability factors of traditional olive groves on Lesbos Island, Greece (Sustainability and traditional cultivation). *GeoJournal* **73**(2), 149-159 (2008).
135. Gismondi, M. Reinforcing landscape rehabilitation using visibility analysis: a case study of Western Liguria, Italy. *Geogr. Rev. Jpn. B* **83**(2), 79-88 (2011).
136. Grimalt, M., Blazquez, M. & Rodriguez, R. Physical factors, distribution and present use of terraces in the Tramuntana mountain range. *Pirineos* **139**, 15-25 (1992).
137. Haiman, M. Dating the Agricultural Terraces in the Southern Levant Deserts: The Spatial-Contextual Argument. *J. Arid Environ.* **86**, 43-49 (2012).
138. Hammad, A. A., Haugen, L. E. & Borresen, T. Effects of stonewalled terracing techniques on soilwater conservation and wheat production under Mediterranean conditions. *Environ. Manage.* **34**, 701-710 (2004).

139. Hammad, A. A. & Børresen, T. Socioeconomic factors affecting farmers' perceptions of land degradation and stonewall terraces in central Palestine. *Environ. Manage.* **37**(3), 380-394 (2006).
140. Hayes, R. D. A Peasant Economy in North-West Portugal. *Geogr. J.* **122**(1), 54-68 (1956).
141. Inbar, M. & Zgaier, A. Physical and social aspects of land degradation in mediterranean highland terraces: a geodiversity approach. *Annales-Anali Za Istrske In Mediteranske Studije-Series Historia Et Sociologia* **26**(3), 419-432 (2016).
142. Khalil, A. Environmental services, externalities and agriculture: the case of mountain tourism in Morocco. *J. Agric. Dev. Econ.* **1**(853-2016-56095), 63 (2004).
143. Khelifa, W. B. *et al.* in. Book of Proceedings of the 2nd International Conference on Integrated Environmental Management for Sustainable Development (ed. Elleuch, B.) 251-265 (Sousse, 2016).
144. Khelifa, W. B. Parameterization of the effect of bench terraces on runoff and sediment yield by SWAT modeling in a small semi-arid watershed in Northern Tunisia. *Land Degrad. Dev.* **28**(5), 1568-1578 (2017).
145. Kiesow, S. & Bork, H. R. Agricultural terraces as a proxy to landscape history on Madeira island, Portugal. *Ler História* **(71)**, 127-152 (2017).
146. Kizos, T., Dalaka, A. & Petanidou, T. Farmers' attitudes and landscape change: Evidence from the abandonment of terraced cultivations on Lesvos, Greece. *Agr. Hum. Values* **27**(2), 199-212 (2010a).
147. Kizos, T. & Koulouri, M. Economy, demographic changes and morphological transformation of the agri-cultural landscape of Lesvos, Greece. *Hum. Ecol. Rev.* **12**, 183-192 (2005).
148. Kizos, T. & Koulouri, M. Agricultural landscape dynamics in the Mediterranean: Lesvos (Greece) case study using evidence from the last three centuries. *Environ. Sci. Policy* **9**(4), 330-342 (2006).
149. Kizos, T. & Koulouri, M. Same land cover, same land use at the large scale, different landscapes at the small scale: landscape change in olive plantations on Lesvos Island, Greece. *Landsc. Res.* **35**(4), 449-467 (2010a).
150. Kizos, T., Koulouri, M., Vakoufaris, H. & Psarrou, M. Preserving Characteristics of the Agricultural Landscape through Agri-Environmental Policies: The Case of Cultivation Terraces in Greece. *Landsc. Res.* **35**, 577-593 (2010b).
151. Kladnik, D. *et al.* Diversity of terraced landscapes in Slovenia. *Annales-Anali Za Istrske In Mediteranske Studije-Series Historia Et Sociologia* **26**(3), 469-486 (2016).
152. Kladnik, D., Šmid Hribar, M. & Geršič, M. Terraced landscapes as protected cultural heritage sites. *Acta geographica Slovenica* **57**(2), 131-148 (2017).
153. Kokalj, Ž. Estimation of terracing characteristics from airborne laser scanning data. *Geophysical Research Abstracts* **17**, 5252-1 (2015).
154. Komac, B. & Zorn, M. in: *Terraced Landscapes of the Alps. Projects in Progress* (eds Fontanari, E. & Patassini, D.) 23-28 (Marsilio, 2008).
155. Koster, K., Guttman-Bond, E., Kluiving, S. & van Leusen, M. *The influence of agricultural terraces on archaeological soil preservation in Northern-Calabria, Italy* (IGBA Rapport, 2011).
156. Koulouri, M. & Giourga, C. Land abandonment and slope gradient as key factors of soil erosion in Mediterranean terraced lands. *Catena* **69**(3), 274-281 (2007).
157. Krahtopoulou, A. & Frederick, C. The Stratigraphic Implications of Long-Term Terrace Agriculture in Dynamic Landscapes: Polycyclic Terracing from Kythera Island, Greece. *Geoarchaeology* **23**(4), 550-585 (2008).
158. Kullaj, E. *et al.* *Following Olive Footprints in Albania* (AARINENA, IOC, ISHR, 2012).
159. Kvapil, L. A. *The Agricultural Terraces of Korphos-Kalamianos: A Case Study of the Dynamic Relationship Between Land Use and Socio-Political Organization in Prehistoric Greece*. (Ph.D. Dissertation, University of Cincinnati, 2012).
160. Lasanta, T., Arnáez, J., Oserín, M. & Ortigosa, L. M. Marginal lands and erosion in terraced fields in the Mediterranean mountains. *Mt Res. Dev.* **21**(1), 69-77 (2001).
161. Lasanta, T., Arnáez, J., Ruiz Flaño, P. & Lana-Renault Monreal, N. Agricultural terraces in the Spanish mountains: an abandoned landscape and a potential resource. *Boletín de la Asociación de Geógrafos Españoles* **63**, 487-491 (2013).
162. Lasanta, T., Errea, M. P. & Nadal-Romero, E. Traditional agrarian landscape in the Mediterranean mountains. A regional and local factor analysis in the central Spanish Pyrenees. *Land Degrad. Dev.* **28**, 1626-1640 (2017).
163. Lasen, C. & Fagarazzi, L. in *Terraced landscapes of the Alps* (eds Scaramellini, G. & Varotto M.) 55-60 (Marsilio, 2008).
164. Lesschen, J. P. *Multi-scale interactions between soil, vegetation and erosion in the context of agricultural land abandonment in a semi-arid environment* (Doctoral dissertation, Universiteit van Amsterdam, 2008).



165. Lesschen, J. P., Cammeraat, L. H. & Nieman, T. Erosion and terrace failure due to agricultural land abandonment in a semi-arid environment. *Earth Surf. Proc. Land*. **33**, 1574–1584 (2008).
166. Lesschen, J. P., Schoorl, J. M., Cammeraat, L. H. Modelling runoff and erosion for a semi-arid catchment using a multi-scale approach based on hydrological connectivity. *Geomorphology* **109**(3–4), 174–183 (2009).
167. Llorens, P., Latron, J. & Gallart, F. Analysis of the role of agricultural abandoned terraces on the hydrology and sediment dynamics in a small mountainous basin (High Llobregat, East Pyrenees). *Pirineos* **139**, 27–46 (1992).
168. Magalães, M. J., Sequeira, E. M. & Lucas, M. D. Copper and zinc in vineyards of central Portugal. *Water, Air, Soil Pollut.* **26**(1), 1–17 (1985).
169. Marchamalo, M., Hooke, J. M. & Sandercock, P. J. Flow and sediment connectivity in semi-arid landscapes in SE Spain: patterns and controls. *Land Degrad. Dev.* **27**(4), 1032–1044 (2016).
170. Martínez-Casasnovas, J. A. & Ramos, M. C. The cost of soil erosion in vineyard fields in the Penedès e Anoia Region (NE Spain). *Catena* **68**, 194–199 (2006).
171. Martínez-Casasnovas, J. A., Ramos, M. C. & Cots-Folch, R. Influence of the EU CAP on terrain morphology and vineyard cultivation in the Priorat region of NE Spain. *Land Use Pol.* **27**(1), 11–21 (2010a).
172. Martínez-Casasnovas, J. A., Ramos, M. C. & Espinal-Utgés, S. Hillslope terracing effects on the spatial variability of plant development as assessed by NDVI in vineyards of the Priorat region (NE Spain). *Environ. Monit. Assess.* **163**(1–4), 379–396 (2010b).
173. Martínez-Hernández, C., Rodrigo-Comino, J. & Romero-Díaz, A. Impact of lithology and soil properties on abandoned dryland terraces during the early stages of soil erosion by water in south-east Spain. *Hydrological Process.* **31**(17), 3095–3109 (2017).
174. Masri, Z. & Zobisch, M. in *Where the land is greener: Case studies and analysis of soil and water conservation initiatives worldwide* (eds. Liniger, H., Critchley, W., Gurtner, M., Schwilch, G. & Mekdaschi Studer, R.) 249–252 (WOCAT, 2007).
175. Mauro, G. in *Geocomputation, Sustainability and Environmental Planning* (eds. Murgante, B., Borruso, G. & Lapucci, A.) 91–109 (Springer, 2011).
176. Mauro, G. Paesaggi terrazzati in costiera triestina, tra problematiche di abbandono ed ipotesi di ri-valutazione turistica. *Documenti geografici* **2**, 67–89 (2015).
177. Meerkkerk, A. L., van Wesemael, B. & Bellin, N. Application of connectivity theory to model the impact of terrace failure on runoff in semi-arid catchments. *Hydrological Process.* **23**, 2792–2803 (2009).
178. Missaoui, H. in *Sustainability of Irrigated Agriculture* (eds. Pereira, L. S., Feddes, R. A., Gilley, J. R. & Lesaffre, B.) 121–135 (Springer, 1996).
179. Modica, G., Praticò, S., Pollino, M. & Di Fazio, S. in *International Conference on Computational Science and Its Applications* (eds. Murgante B. et al.) 479–494 (Springer, 2014).
180. Modica, G., Praticò, S. & Di Fazio, S. Abandonment of traditional terraced landscape: a change detection approach (a case study in Costa Viola, Calabria, Italy). *Land Degrad. Dev.* **28**, 2608–2622 (2017).
181. Molina, A. J., Latron, J., Rubio, C. M., Gallart, F. & Llorens, P. Spatio-temporal variability of soil water content on the local scale in a Mediterranean mountain area (Vallcebre, North Eastern Spain). How different spatio-temporal scales reflect mean soil water content. *J. Hydrol.* **516**, 182–192 (2014).
182. Momirski, L. A. in *Terraced landscapes of the Alps* (eds Scaramellini, G. & Varotto M.) 102–107 (Marsilio, 2008).
183. Momirski, L. A. Assessing the Reliability of Land-Use Data in Slovenia: A Case Study of Terraced Landscapes. *IOP Conf. Series: Materials Science and Engineering* **245**, 062042 (2017).
184. Momirski, L. A. & Berčič, T. Ignored regions: Slovenian terraced landscapes. *Annales-Anali Za Istrske In Mediteranske Studije-Series Historia Et Sociologia* **26**(3), 399–418. (2016).
185. Momirski, L. A. & Gabrovec, M. in *Land use, cover changes in selected regions in the world* (eds Himiyama, Y., Mather, A., Bicik, I., Milanova, E. V.) 33–42 (IGU-LUCC, 2014).
186. Momirski, L. A. & Kladnik, D. Terraced landscapes in Slovenia. *Acta Geogr. Slov.* **49**(1), 7–37 (2009).
187. Momirski, A. L., Kladnik, D. The terraced landscape in the Brkini Hills. *Acta Geogr. Slov.* **55-1**, 29–58 (2015).
188. Momirski, A. L., Skvarc, A. & Kodric, I. in: *Terraced Landscapes of the Alps. Projects in Progress* (eds Fontanari, E. & Patassini, D.) 40–46 (Marsilio, 2008).
189. Montanari, B. in *The Future of Mountain Agriculture* (ed. Mann S.) 51–72 (Springer, 2013).
190. Moody, J. & Grove, A. T. in *Man's Role in the Shaping of the Eastern Mediterranean Landscape: Proceedings of the Symposium on the Impact of Ancient Man on the Landscape of the E Med Region & the Near East* (eds. Bottema, S., Entjes-Nieborg, G. & van Zeist, W.) 183 (CRC Press, 1990).
191. Nicolosi, A., Cambareri, D. & Petulla, M. in *Proceedings of the European Association of Agricultural Economists (EAAE) International Congress* (ed.) 724–2016–49193 (EAAE, 2005).

192. Ninfo, A. in: *Terraced Landscapes of the Alps. Projects in Progress* (eds Fontanari, E. & Patassini, D.) 29-30 (Marsilio, 2008).
193. Nunes, J. P. *et al.* Hydrological and erosion processes in terraced agricultural fields: observations from a wet Mediterranean region in northern Portugal. *Geophysical Research Abstracts* **17**, 7657 (2015).
194. Nunes, J.P. *et al.* Hydrological and erosion processes in terraced fields: observations from a humid Mediterranean region in Northern Portugal. *Land Degrad. Dev.* **29**(3), 596-606 (2018).
195. Olarieta, J. R., Rodriguez-Valle, F. L. & Tello, E. Preserving and destroying soils, transforming landscapes: Soils and land-use changes in the Valles County (Catalunya, Spain) 1853–2004. *Land Use Pol.* **25**(4), 474-484 (2008).
196. Oliveira, M. T., 2001. Modeling water content of a vineyard soil in the Douro Region, Portugal. *Plant Soil* **233**, 213-221 (2001).
197. Ore, G. & Bruins, H. J. Design features of ancient agricultural terrace walls in the Negev desert: Human-made geodiversity. *Land Degrad. Dev.* **23**(4), 409-418 (2012).
198. Otero, I., Boada, M. & Tàbara, J. D. Social–ecological heritage and the conservation of Mediterranean landscapes under global change. A case study in Olzinelles (Catalonia). *Land Use Pol.* **30**(1), 25-37 (2013).
199. Ouassar, M. *et al.* Modelling water-harvesting systems in the arid south of Tunisia using SWAT. *Hydrol. Earth Syst. Sci.* **13**(10), 2003-2021 (2009).
200. Paliaga, G., Giostrella, P. & Faccini, F. Terraced landscape as cultural and environmental heritage at risk: An example from Portofino Park (Italy). *Annales-Anali Za Istrske In Mediteranske Studije-Series Historia Et Sociologia* **26**(3), 513-522 (2016).
201. Palmer, C., Colledge, S., Bevan, A., Conolly, J. Vegetation recolonisation of abandoned agricultural terraces on Antikythera Greece. *Environ. Archaeol.* **15**, 64–80 (2010).
202. Papanastasis, V. P. in *Old fields: dynamics and restoration of abandoned farmland* (eds. Cramer V. A. & Hobbs R. J.) 225-246 (Island Press, 2007).
203. Pereira, S., Zêzere, J. L. & Bateira, C. Sensitivity analysis of conditioning factors for landslide susceptibility evaluation in Santa Marta de Penaguiño (Douro valley-Portugal). *Geophysical Research Abstracts*, **11**, 5226 (2009).
204. Pereira Dra, D., Recio, S. & Carlos Gonzalo, J. Evolution of the landscape as a response of a demographic change. A case study in the Duero riverside, Spain. *Local Environ.* **15**(5), 419-431 (2010).
205. Perlotto, C. & D'Agostino, V. Performance assessment of bench- terraces through 2-D modelling. *Land Degrad. Dev.* **29**(3), 607-616 (2018).
206. Petanidou, T., Kizos, T. & Soulakellis, N. Socioeconomic Dimensions of Changes in the Agricultural Landscape of the Mediterranean Basin: A Case Study of the Abandonment of Cultivation Terraces on Nisyros Island, Greece. *Environ. Manage.* **41**, 250-266 (2008).
207. Petropoulou, E. A. in *Proceedings of the International Environmental Conference: Sustainable Management and Development of Mountainous and Island Areas* (ed. Manolas, E.I.) 47-56 (Democritus University of Thrace, 2006).
208. Petropoulou, E. A. Indigenous resource management and environmental degradation: southern Greece. *Manag. Environ. Qual.* **18**(2), 152-166 (2007).
209. Pijl, A., Tosoni, M., Roder, G., Sofia, G. & Tarolli, P. Design of Terrace Drainage Networks Using UAV-Based High-Resolution Topographic Data. *Water* **11**(4), 814 (2019).
210. Pipan, P. & Kokalj, Ž. Transformation of the Jerusalem Hills cultural landscape with modern vineyard terraces. *Acta Geogr. Slov.* **57**(2), 149-162 (2017).
211. Pla, I. & Nacci, S. in *Techniques Traditionnelles de GCES en milieu méditerranéen. Bulletin Réseau Erosion* (eds. Roose, E., Sabir, M. & de Noni, G.) 213-223 (IRD, ENFI, 2003).
212. Pleguezuelo, C. R., Duran Zuazo, V., Fernandez, J. M., Peinado, F. M. & Tarifa, D. F. Litter decomposition and nitrogen release in a sloping Mediterranean subtropical agroecosystem on the coast of Granada (SE, Spain): effects of floristic and topographic alteration on the slope. *Agric. Ecosyst. Environ.* **134**(1-2), 79-88 (2009).
213. Porat, N., Davidovich, U., Avni, Y., Avni, G. & Gadot, Y. Using OSL measurements to decipher soil history in archaeological terraces, Judean Highlands, Israel. *Land Degrad. Dev.* **29**(3), 643-650 (2018).
214. Poyatos, R., Latron, J. & Llorens, P. Land use and land cover change after agricultural abandonment. *Mt Res. Dev.* **23**(4), 362-369 (2003).
215. Preti, F., Errico, A., Caruso, M., Dani, A. & Guastini, E. Dry-stone wall terrace monitoring and modelling. *Land Degrad. Dev.* **29**(6), 1806-1818 (2018a).
216. Preti, F. *et al.* Conceptualization of water flow pathways in agricultural terraced landscapes. *Land Degrad. Dev.* **29**(3), 651-662 (2018b).
217. Preti, F., Tarolli, P., Dani, A., Calligaro, S. & Prosdocimi, M. LiDAR derived high resolution topography: the next challenge for the analysis of terraces stability and vineyard soil erosion. *J. Agric. Eng.* **44**, 85-89 (2013).

218. Price, S. & Nixon, L. Ancient Greek agricultural terraces: Evidence from texts and archaeological survey. *Am. J. Archaeol.* **109**, 665-694 (2005).
219. Puy, A. & Balbo, A. L. The genesis of irrigated terraces in al-Andalus. A geoarchaeological perspective on intensive agriculture in semi-arid environments (Ricote, Murcia, Spain). *J. Arid Environ.* **89**, 45-56 (2013).
220. Ramos, M. C. Soil losses in rainfed Mediterranean vineyards under climate change scenarios. The effects of drainage terraces. *AIMS Agric. Food* **1**, 124-143 (2016).
221. Ramos, M. C., Cots-Folch, R. & Martínez-Casasnovas, J. A. Sustainability of modern land terracing for vineyard plantation in a Mediterranean mountain environment—The case of the Priorat region (NE Spain). *Geomorphology* **86(1-2)**, 1-11 (2007).
222. Ramos, M. C., Benito, C. & Martínez-Casasnovas, J. A. Simulating soil conservation measures to control soil and nutrient losses in a small, vineyard dominated, basin. *Agric. Ecosyst. Environ.* **213**, 194-208 (2015).
223. Ramos, M. C. & Porta, J. Analysis of design criteria for vineyard terraces in the Mediterranean area of North East Spain. *Soil Technol.* **10**, 155-166 (1997).
224. Rendu, C. *et al.* Reconstructing past terrace fields in the Pyrenees: Insights into land management and settlement from the Bronze Age to the Early Modern era at Vilalta (1650 masl, Cerdagne, France). *J. Field Archaeol.* **40(4)**, 461-480 (2015).
225. Ridder, E., Galletti, C. S., Fall, P. L. & Falconer, S. E. Economic and social activities on ancient Cypriot terraced landscapes. *J. Environ. Manag.* **202**, 514-523 (2017).
226. Rodrigo-Comino, J., Martínez-Hernández, C., Iserloh, T. & Cerdà, A. Contrasted impact of land abandonment on soil erosion in Mediterranean agriculture fields. *Pedosphere* **28(4)**, 617-631 (2018).
227. Rolé, A. in *Europe's Living Landscapes* (eds. Pedroli, B., van Doorn, A. & de Blust G.) 405-420 (KNNV Publishing, 2007).
228. Rolé, A. & Attard, G. *The cost of soil replacement: a Maltese case study* (MEDCOASTLAND Project, 2004 Report, 2004).
229. Rolé, A. & Attard, G. *Soil problems in malta—addressing current threats through strategic measures* (MEDCOASTLAND Project, 2008 Report, 2008).
230. Rolé, A. *et al.* *Sustainable rural land management in the Maltese Islands: an evaluation of policy instruments and future needs* (MEDCOASTLAND Project, 2005 Report, 2005).
231. Romero Díaz, A., Marín Sanleandro, P. & Sánchez Soriano, A. in *Proceedings of the IV International Symposium on Gully Erosion “Progress in Gully Erosion Research”* (eds. Casali, J. & Giménez, R.) 106-107 (Universidad Pública de Navarra/Nafarroako Unibertsitate Publikoa, 2007a).
232. Romero Díaz, A., Marín Sanleandro, P., Sánchez Soriano, A., Belmonte Serrato, F. & Faulkner, H. The causes of piping in a set of abandoned agricultural terraces in southeast Spain. *Catena* **69**, 282-293 (2007b).
233. Romero Martín, L. E., Cordero, A. I. H., Cordero, A. S., Negrín, C. V. & Salazar, J. M. P. in: *World Terraced Landscapes: History, Environment, Quality of Life. Environmental History* (eds Varotto, M., Bonardi, L. & Tarolli P.) 97-118 (Springer, 2019).
234. Romero Martín, L. E., Gonzalez Morales, A. & Ramon Ojeda, A. Towards a new valuation of cultural terraced landscapes: The heritage of terraces in the Canary Islands (Spain). *ANNALES Series Historia et Sociologia* **26(3)**, 499-512 (2016).
235. Ron, Z. Y. Agricultural terraces in the Judean Mountains. *Isr. Explor. J.* **16**, 33-49 (1966).
236. Ron, Z. Y. Development and management of irrigation systems in mountain regions of the Holy Land. *Trans. Inst. Br. Geogr.* **10**, 149-169 (1985).
237. Ruecker, G., Schad, P., Alcubilla, M. M. & Ferrer, C. Natural regeneration of degraded soils and site changes on abandoned agricultural terraces in Mediterranean Spain. *Land Degrad. Dev.* **19**, 488-501 (1998).
238. Rühl, J., Pasta, S., Schnittler, M. & Palermo Univ. (Italy). A chronosequence study of vegetation dynamics on abandoned vine and caper terraces of Pantelleria Island (Sicily). *Archives of Nature Conservation and Landscape Research* **45(1)**, 71-94 (2006).
239. Rusjan, D., Strlič, M., Pucko, D. & Korošec-Koruza, Z. Copper accumulation regarding the soil characteristics in Sub-Mediterranean vineyards of Slovenia. *Geoderma* **141(1-2)**, 111-118 (2007).
240. Sanchez-Maranon, M., Soriano, M., Delgado, G. & Delgado, R. Soil quality in Mediterranean mountain environments. Effects of land use change. *Soil Sci. Soc. Am. J.* **66**, 948-958 (2002).
241. Sauer, T. & Ries, J. B. Vegetation cover and geomorphodynamics on abandoned fields in the Central Ebro Basin (Spain). *Geomorphology* **102(2)**, 267-277 (2008).
242. Satıcı, S. *Lithological and morphological control on the agricultural terraces in Bozburun peninsula, Turkey* (Doctoral dissertation, Middle East Technical University, 2013).

243. Sayadi, S. in *Agroforestry systems as a technique for sustainable land management* (eds. Mosquera-Losada M. R., Fernández-Lorenzo J. L. & Rigueiro-Rodríguez A.) 131-144 (AECID, 2009).
244. Sayej, G. in *The Landscape of Palestine: Equivocal Poetry* (eds. Abu-Lughod, I., Heacock, R. & Nashef K.) 201-210 (Bllirzeit University Publications, 1999).
245. Savo, V., Caneva, G., McClatchey, W., Reedy, D. & Salvati, L. Combining environmental factors and agriculturalists' observations of environmental changes in the traditional terrace system of the Amalfi Coast (Southern Italy). *Ambio* **43**, 297-310 (2014).
246. Scalenghe, R., Bonifacio, E., Celi, L., Ugolini, F. C. & Zanini, E. Pedogenesis in disturbed Alpine soils (NW Italy). *Geoderma* **109**, 207-224 (2002).
247. Scaramellini, G. in *Terraced landscapes of the Alps* (eds Scaramellini, G. & Varotto M.) 10-18 (Marsilio, 2008).
248. Schietecatte, W. *et al.* Impact of water harvesting techniques on soil and water conservation: a case study on a micro catchment in southeastern Tunisia. *J. Arid Environ.* **61**(2), 297-313 (2005).
249. Scopesi, C., Rellini, I., Maerker, M. & Firpo, M. Effects of land-cover changes on flood generation in a small Mediterranean catchment (T. Teiro, Italy). *Rendiconti Online Societa Geologica Italiana* **21**(1), 431-433 (2012).
250. Scopesi, C. *et al.* in *Proceedings of the Fifth International Congress On Mountain and Steep Slope Viticulture "Extreme viticulture: values, beauties, alliances, vulnerabilities"* (CERVIM, CREA) 106-112 (CERVIM, CREA, 2017).
251. Seeger, M. & Ries, J. B. Soil degradation and soil surface process intensities on abandoned fields in Mediterranean mountain environments. *Land Degrad. Dev.* **19**, 488-501 (2008).
252. Segui, J. R. *Traditional pastoralism in the Fageca and Famorca villages (Mediterranean Spain): An ethnoarchaeological approach* (Doctoral dissertation, University of Leicester, 1999).
253. Siebert, S. F. Traditional Agriculture and the Conservation of Biological Diversity in Crete, Greece. *Int. J. Agr. Sustain.* **2**, 109-117 (2004).
254. Sitjes, E. in *Agricultural and Pastoral Landscapes in Pre-industrial Society: Choices, Stability and Change* (eds. Retamero, F., Schjellerup, I. & Davies, A.) 201-220 (Oxbow Books, 2014).
255. Slapšak, B., Erič, M., Mušič, B. & Plevnik, D. *Landscape structures survey in the Chora of Pharos. Ancient landscapes and rural structures* (COST Action G2, 1998).
256. Šmid Hribar, M. *et al.* Cultivated terraces in Slovenian landscapes. *Acta Geogr. Slov.* **57**, 83-97 (2017).
257. Sofia, G., Marinello, F. & Tarolli, P. A new landscape metric for the identification of terraced sites: the Slope Local Length of Auto-Correlation (SLLAC). *ISPRS J. Photogramm.* **96**, 123-133 (2014).
258. Solé-Benet, A., Lázaro, R., Domingo, F., Cantón, Y. & Puigdefábregas, J. Why most agricultural terraces in steep slopes in semiarid SE Spain remain well preserved since their abandonment 50 years go? *Pirineos* **165**, 215-235 (2010).
259. Stager, L. E. The Archaeology of the East Slope of Jerusalem and the Terraces of the Kidron. *J. Near East. Stud.* **41**(2), 111-121 (1982).
260. Stanislawski, D. The Monchique of southern Portugal. *Geogr. Rev.* **52**(1), 37-55 (1962).
261. Stempfle, S. in *Proceedings of the Second International Conference on Agriculture in an Urbanizing Society Reconnecting Agriculture and Food Chains to Societal Needs* (eds. AgURB) 473-474 (2015).
262. Strahorn, A. T. Agriculture and soils of Palestine. *Geogr. Rev.* **19**(4), 581-602 (1929).
263. Stavi, I., Gusarov, Y. & Halbac-Cotoara-Zamfir, R. Collapse and failure of ancient agricultural stone terraces: On-site geomorphic processes, pedogenic mechanisms, and soil quality. *Geoderma* **344**, 144-152 (2019).
264. Stavi, I., Rozenberg, T., Al-Ashhab, A., Argaman, E. & Groner, E. Failure and collapse of ancient agricultural stone terraces: On-Site effects on soil and vegetation. *Water* **10**(10), 1400 (2018).
265. Stavi, I., Shem-Tov, R., Ragolsky, G. & Lekach, J. Ancient runoff harvesting agriculture in the hyper-arid Uvda Valley of Israel: An agro-hydrological assessment. *Land Degrad. Dev.* **28**(7), 2155-2165 (2017).
266. Talhouk, S. N. *et al.* Patterns of floristic diversity in semi-natural coastal vegetation of Lebanon and implications for conservation. *Biodivers. Conserv.* **14**(4), 903-915 (2005).
267. Tarolli, P., Preti, F. & Romano, N. Terraced landscapes: From an old best practice to a potential hazard for soil degradation due to land abandonment. *Anthropocene* **6**, 10-25 (2014).
268. Tarolli, P. *et al.* Vineyards in terraced landscapes: new opportunities from lidar data. *Land Degrad. Dev.* **26**, 92-102 (2015).
269. Tatoni, T. & Roche, P. Comparison of old-field and forest revegetation dynamics in Provence. *J. Veg. Sci.* **5**(3), 295-302 (1994).
270. Terkenli, T. S., Cisani, M. & Castiglioni, B. Is there a future for tourism in terraced landscapes? A comparative study of landscape resources and tourism consequences in Valtellina (Italy) and Lesvos (Greece). *Annales-Anali Za Istrske In Mediteranske Studije-Series Historia Et Sociologia* **28**, 725-740 (2018).

271. Terranova, R. Il paesaggio costiero terrazzato delle Cinque Terre in Liguria. *Studi e Ricerche di Geografia* **12**, 1–58 (1989).
272. Torquati, B., Cecchini, L., Venanzi, S. & Giacchè, G. in: *World Terraced Landscapes: History, Environment, Quality of Life. Environmental History* (eds Varotto, M., Bonardi, L. & Tarolli P.) 251-271 (Springer, 2019).
273. Tsermegas, I., Dłużewski, M., Biejat, K. & Szykiewicz, A. Function of agricultural terraces in Mediterranean conditions-selected examples from the island of Ikaria (the Southern Sporades, Greece). *Miscellanea Geographica* **15**(1), 65-78 (2011).
274. Tzanopoulos, J. & Vogiatzakis, I. N. Processes and patterns of landscape change on a small Aegean island: The case of Sifnos, Greece. *Landscape Urban Plan.* **99**(1), 58-64 (2011).
275. Van Asperen, H. L., Bor, A. M. C., Sonneveld, M. P. W., Bruins, H. J. & Lazarovitch, N. Properties of anthropogenic soils in ancient run-off capturing agricultural terraces in the Central Negev desert (Israel) and related effects of biochar and ash on crop growth. *Plant and Soil* **374**(1-2), 779-792 (2014).
276. Van der Sluis, T., Kizos, T. & Pedroli, B. Landscape change in Mediterranean farmlands: impacts of land abandonment on cultivation terraces in Portofino (Italy) and Lesvos (Greece). *Landsc. Ecol.* **7**(1), 23-44 (2014).
277. Varotto M. & Ferrarese F. in *Terraced landscapes of the Alps* (eds Scaramellini, G. & Varotto M.) 38-45 (Marsilio, 2008).
278. Werder, S., Andrei, F., Beti, M., Michael, M. in: *Terraced Landscapes of the Alps. Projects in Progress* (eds Fontanari, E. & Patassini, D.) 60-62 (Marsilio, 2008).
279. Wilson, G., Quaranta, G., Kelly, C. & Salvia, R. Community resilience, land degradation and endogenous lock-in effects: evidence from the Alento region, Campania, Italy. *J. Environ. Plan. Manag.* **59**(3), 518-537 (2016).
280. Zgaier, A. Landslides on agricultural hillslope terraces under Mediterranean climatic conditions. *Isr. J. Earth Sci.* **57**, 249-261 (2008).
281. Zgaier, A. & Inbar, M. in *Catchment dynamics and river processes: Mediterranean and other climate regions* (eds. Garcia, C. & Batalla R. J.) 69–86 (Elsevier, 2005).
282. Ziyadi, M. *et al.* in *Climate Change-Resilient Agriculture and Agroforestry. Climate Change Management* (eds. Castro, P., Azul, A., Leal Filho, W. & Azeiteiro, U.) 1-19 (Springer, 2019).
283. Zoumides, C., Bruggeman, A., Djuma, H., Camera, C. & Giannakis, E. Soil Threats and Ecosystems Services in the Troodos Mountains of Cyprus. *Geophysical Research Abstracts* **17**, 14937-1 (2015).
284. Zoumides, C. *et al.* Community-based rehabilitation of mountain terraces in Cyprus. *Land Degrad. Dev.* **28**(1), 95-105 (2017a).
285. Zoumides, C., Giannakis, E., Bruggeman, A. & Camera, C. Living terraced landscapes: Exploring the viability of mountain terraced vineyards in Cyprus. *Geophysical Research Abstracts* **19**, 1303 (2017b).
